# Supplementary material
Source: PubMed Central journal article supplement (PMC3289311)
Supplement: 1112264109_Appendix.pdf [file 1112264109_Appendix.pdf]

## *Supporting Information*

### **Exclusive recognition of sarcosine in water and urine by a cavitand-functionalized silicon surface.**

**Elisa Biavardi,<sup>a</sup> Cristina Tudisco,<sup>b</sup> Francesca Maffei,<sup>a</sup> Alessandro Motta,<sup>b</sup>  
Chiara Massera,<sup>c</sup> Guglielmo G. Condorelli<sup>b\*</sup> and Enrico Dalcanale<sup>a\*</sup>**

<sup>a</sup> Dip.to di Chimica Organica ed Industriale and INSTM, UdR Parma, Università degli Studi di Parma, Parco Area delle Scienze n 17/A, 43124 Parma, Italy. e-mail: [enrico.dalcanale@unipr.it](mailto:enrico.dalcanale@unipr.it).

<sup>b</sup> Dip.to di Scienze Chimiche, Università di Catania and INSTM, UdR Catania, V.le A. Doria n°6, 95100 Catania, Italy. e-mail: [guidocon@unict.it](mailto:guidocon@unict.it).

<sup>c</sup> Dip.to di Chimica Generale ed Inorganica, Chimica Analitica, Chimica Fisica, Università degli Studi di Parma, Parco Area delle Scienze n°17/A, 43124 Parma, Italy. e-mail: [chiara.massera@unipr.it](mailto:chiara.massera@unipr.it).

## Table of Contents.

|                                                                                                  |         |
|--------------------------------------------------------------------------------------------------|---------|
| Materials and Methods.                                                                           | S1      |
| Synthesis of Tiiii[C <sub>10</sub> H <sub>19</sub> , CH <sub>3</sub> , Ph].                      | S2      |
| Tiiii grafting on Si.                                                                            | S3      |
| Crystal structures.                                                                              | S3-S9   |
| Job Plot, <sup>1</sup> H NMR and <sup>31</sup> P NMR of complex Tiiii•sarcosine methyl ester.    | S10-S11 |
| ITC measurements.                                                                                | S12     |
| Sarcosine complexation at the chloroform-water interface.                                        | S13     |
| Solid sarcosine dissolution in chloroform upon complexation.                                     | S14     |
| HR-ESI-MS for the complex Tiiii[C <sub>3</sub> H <sub>7</sub> , CH <sub>3</sub> , Ph]•sarcosine. | S15     |
| GC-SIM-MS analyses of urine samples containing sarcosine before and after filtration             | S15-S17 |
| DFT calculations and Computational details.                                                      | S18-S33 |
| References.                                                                                      | S34     |

## Materials and Methods.

<sup>1</sup>H NMR and <sup>13</sup>C NMR spectra were obtained using a Bruker AVANCE 400 spectrometer. All chemical shifts ( $\delta$ ) were reported in ppm relative to the proton resonances resulting from incomplete deuteration of the NMR solvents. <sup>31</sup>P NMR spectra were obtained using a Bruker AVANCE 400 (162 MHz) spectrometer. All chemical shifts ( $\delta$ ) were recorded in ppm relative to external 85% H<sub>3</sub>PO<sub>4</sub> at 0.00 ppm. Electrospray ionization ESI-MS experiments were performed on a LTQ Orbitrap XL (Thermo Scientific) mass spectrometer equipped with an Desorption electrospray ionization (DESI) interface or an electrospray ionization (ESI) interface. All solvents were dried and distilled using standard procedures. All commercial reagents were ACS reagent grade and used as received. XPS spectra were run with a PHI 5600 multi-technique ESCA-Auger spectrometer adopting a standard Mg *K* $\alpha$  X-ray source. Analyses were carried out with a photoelectron angle of 45° (relative to the sample surface) with an acceptance angle of  $\pm$  7°. The XPS binding energy (BE) scale was calibrated by centering the C 1s peak due to hydrocarbon moieties and “adventitious” carbon at 285.0 eV.<sup>1</sup> Fluorescence spectra on Si monolayers were obtained with a spectrofluorimeter SPEX FLUOROLOG 111, equipped with a solid plate sample holder for detection in front face. The acquisition mode used was signal/reference, thus correcting the emission spectra for the detection/optical response of the spectrometer. The excitation wavelengths ( $\lambda_{\text{ex}}$ ) was:  $\lambda_{\text{ex}} = 340$  nm and the spectrum registered in the 390-500 nm range.

## Synthesis of T<sub>iiii</sub>[C<sub>10</sub>H<sub>19</sub>, CH<sub>3</sub>, Ph].

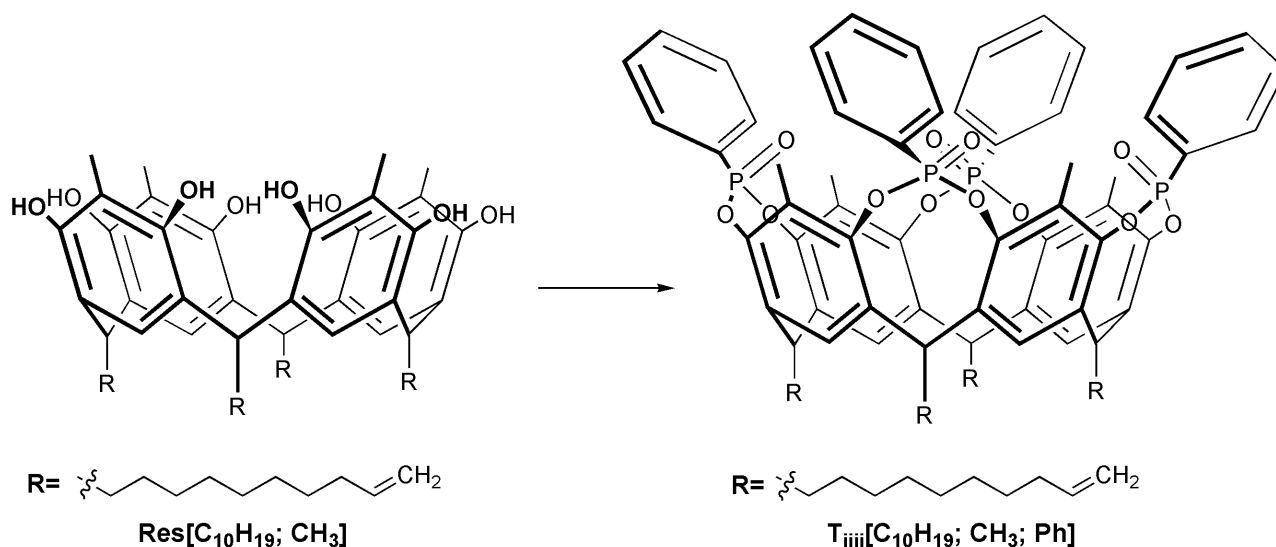

**Scheme S1.** Synthesis of T<sub>iiii</sub>[C<sub>10</sub>H<sub>19</sub>, CH<sub>3</sub>, Ph].

To a solution of resorcinarene (2) (1g, 0.91 mmol) in freshly distilled pyridine (10 mL) dichlorophenylphosphine (0.504 mL, 3.72 mmol) was added slowly, at room temperature. After 3 hours of stirring at 80 °C, the solution was allowed to cool at room temperature and 4 mL of 35% H<sub>2</sub>O<sub>2</sub> were added. The resulting mixture was stirred for 30 min at room temperature, then the solvent was removed under reduced pressure and water added. The precipitate obtained in this way was collected by vacuum filtration, and profusely rinsed with diethyl ether to give the product in a quantitative yield. The detailed physical data of the product are shown in Supplementary Information.

**<sup>1</sup>H NMR:** (400 MHz, CDCl<sub>3</sub>): δ (ppm) 8.17-8.12 (m, 8H), 7.68-7.64 (m, 4H), 7.60-7.55 (m, 8H), 7.27 (s, 4H), 5.89-5.79 (m, 4H), 5.05-4.95 (m, 8H), 4.86 (t, 4H, J=7.2 Hz), 2.43-2.37 (m, 8H), 2.31 (s, 12H), 2.09-2.05 (m, 8H), 1.50-1.28 (m, 48H).

**<sup>13</sup>C NMR:** (CDCl<sub>3</sub>, 162 MHz) δ (ppm): 145.1, 139.1, 134.4, 133.6, 131.5, 128.8, 126.6, 125.1, 124.6, 119.1, 114.2, 36.8, 33.8, 31.4, 29.6, 29.1, 28.0, 11.53, 1.02.

**<sup>31</sup>P NMR:** (162 MHz, CDCl<sub>3</sub>): δ (ppm) 6.54 (s).

**HR-DESI-MS (m/z):** [M+NH<sub>4</sub>]<sup>+</sup> calcd. for C<sub>96</sub>H<sub>120</sub>O<sub>12</sub>NP<sub>4</sub>, 1603.77891, found, 1603.78737 (100%);  
[M+Na]<sup>+</sup> calcd. for C<sub>96</sub>H<sub>116</sub>O<sub>12</sub>NaP<sub>4</sub>, 1608.73430, found, 1608.74493 (30%).

### Tiii grafting on Si.

For grafting monolayers, a cavitand/1-octene mixtures ( $\chi_{\text{cav}} = 0.05$ ) were dissolved in mesitylene (solution concentration = 50 mM). Cavitand solutions (2.0 mL) were placed in a quartz cell and deoxygenated by stirring in a dry box for at least 1 h. A Si(100) substrate was dipped in H<sub>2</sub>SO<sub>4</sub>/H<sub>2</sub>O<sub>2</sub> (3:1 v/v) solution for 12 min to remove organic contaminants, then it was etched in a hydrofluoric acid solution (1% v/v) for 90 s and quickly rinsed with water. The resulting hydrogenated silicon substrate was immediately placed in the mesitylene solution. The cell remained under UV irradiation (254 nm) for two hours. The sample was then removed from the solution and sonicated in dichloromethane for 10 min to remove residual physisorbed material.

### Crystal structures.

Crystal data and experimental details for data collection and structure refinement are reported in Table S1. The crystal structures of compounds **Tiii[C<sub>3</sub>H<sub>7</sub>, CH<sub>3</sub>, Ph]•CH<sub>3</sub>OOCCH<sub>2</sub>NH<sub>3</sub>Cl•3CH<sub>3</sub>OH•3H<sub>2</sub>O (1)** and **Tiii[C<sub>3</sub>H<sub>7</sub>, CH<sub>3</sub>, Ph]•HOOCCH<sub>2</sub>NH<sub>2</sub>CH<sub>3</sub>Cl•4CH<sub>3</sub>OH•H<sub>2</sub>O (2)** were determined by X-ray diffraction methods. Intensity data and cell parameters were recorded at 193 K due to the instability of the crystals at room temperature on a Bruker AXS Smart 1000 single-crystal diffractometer (MoK $\alpha$  radiation) equipped with a CCD area detector. The raw frame data were processed using SAINT and SADABS to yield the reflection data file (3). The structures were solved by Direct Methods using the SIR97 program (4) and refined on  $F_o^2$  by full-matrix least-squares procedures, using the SHELXL-97 program (5) in the WinGX suite (6).

The PLATON SQUEEZE procedure (7) was used for both compounds to treat regions of diffuse solvent which could be seen in the difference Fourier map but could not be sensibly modelled in terms of atomic sites. Their contribution to the diffraction pattern was removed and modified  $F_o^2$  written to a new HKL file. The number of electrons located were included in the formula, formula weight, calculated density,  $\mu$  and F(000). In compound **1** the residual electron density of 77 electrons per unit cell corresponds to four molecules of methanol per unit cell (four molecules of methanol would give 72 e). In compound **2** the residual electron density of 95 electrons per unit cell corresponds to four molecules of methanol and two molecules of water per unit cell (four molecules of methanol and two molecules of water would give 92 e).

All non-hydrogen atoms were refined with anisotropic atomic displacements with the exception of: i) one disordered phenyl group of the cavitand, the glycine methyl ester and the solvent molecules in compound **1**; ii) the methanol molecules in compound **2**. The hydrogen atoms were included in the refinement at idealized geometry (C-H 0.95 Å) and refined “riding” on the corresponding parent atoms.

The weighting schemes used in the last cycle of refinement were  $w = 1/[\sigma^2 F_o^2 + (0.0729P)^2]$  and  $w = 1/[\sigma^2 F_o^2 + (0.10280P)^2]$ , where  $P = (F_o^2 + 2F_c^2)/3$  for **1** and **2**, respectively. Molecular geometry calculations were carried out using the PARST97 program (8) Crystallographic data (excluding structure factors) for the structure reported have been deposited with the Cambridge Crystallographic Data Center as supplementary publication no. CCDC-828311 (**1**) and 828312 (**2**) and can be obtained free of charge on application to the

CCDC, 12 Union Road, Cambridge CB2 1EZ, U.K. [Fax: (internat.) + 44-1223/336-033; E-mail: [deposit@ccdc.cam.ac.uk](mailto:deposit@ccdc.cam.ac.uk)]

**Table S1.** Crystal data and structure refinement information for compounds **Ti<sup>iii</sup>[C<sub>3</sub>H<sub>7</sub>, CH<sub>3</sub>, Ph]•CH<sub>3</sub>OOCCH<sub>2</sub>NH<sub>3</sub>Cl•3CH<sub>3</sub>OH•3H<sub>2</sub>O (1)** and **Ti<sup>iii</sup>[C<sub>3</sub>H<sub>7</sub>, CH<sub>3</sub>, Ph]•HOOCCH<sub>2</sub>NH<sub>2</sub>CH<sub>3</sub>Cl•4CH<sub>3</sub>OH•H<sub>2</sub>O (2)**.

| Compound                                                                                    | <b>1</b>                                                          | <b>2</b>                                                          |
|---------------------------------------------------------------------------------------------|-------------------------------------------------------------------|-------------------------------------------------------------------|
| Formula                                                                                     | C <sub>74</sub> H <sub>94</sub> ClNO <sub>20</sub> P <sub>4</sub> | C <sub>75</sub> H <sub>94</sub> ClNO <sub>19</sub> P <sub>4</sub> |
| Molecular weight                                                                            | 1476.83                                                           | 1472.84                                                           |
| Crystal system                                                                              | Triclinic                                                         | Triclinic                                                         |
| Space group                                                                                 | <i>P</i> -1                                                       | <i>P</i> -1                                                       |
| <i>a</i> / Å                                                                                | 14.237(1)                                                         | 14.8953(9)                                                        |
| <i>b</i> / Å                                                                                | 15.190(1)                                                         | 15.3987(9)                                                        |
| <i>c</i> / Å                                                                                | 20.000(2)                                                         | 19.2381(11)                                                       |
| $\alpha$ / °                                                                                | 89.952(2)                                                         | 91.021(1)                                                         |
| $\beta$ / °                                                                                 | 77.113(2)                                                         | 100.114(1)                                                        |
| $\gamma$ / °                                                                                | 62.271(2)                                                         | 118.891(1)                                                        |
| <i>V</i> / Å <sup>3</sup>                                                                   | 3705.3(5)                                                         | 3776.3(4)                                                         |
| <i>Z</i>                                                                                    | 2                                                                 | 2                                                                 |
| <i>T</i> / K                                                                                | 193(2)                                                            | 193(2)                                                            |
| $\rho$ / g cm <sup>-3</sup>                                                                 | 1.324                                                             | 1.295                                                             |
| $\mu$ / mm <sup>-1</sup>                                                                    | 0.210                                                             | 0.205                                                             |
| <i>F</i> (000)                                                                              | 1564                                                              | 1560                                                              |
| Data / parameters                                                                           | 16548 / 809                                                       | 17955 / 851                                                       |
| Total reflections                                                                           | 23605                                                             | 47456                                                             |
| Unique reflections ( <i>R</i> <sub>int</sub> )                                              | 16548 (0.0432)                                                    | 17955 (0.0634)                                                    |
| Observed reflections [ <i>I</i> > 2 $\sigma$ ( <i>I</i> )]                                  | 5823                                                              | 7001                                                              |
| Goodness-of-fit on <i>F</i> <sup>2a</sup>                                                   | 0.965                                                             | 0.882                                                             |
| <i>R</i> indices [ <i>I</i> > 2 $\sigma$ ( <i>I</i> )] <sup>b</sup> <i>R</i> 1, <i>wR</i> 2 | 0.0855, 0.1922                                                    | 0.0561, 0.0973                                                    |
| Largest diff. peak and hole / eÅ <sup>-3</sup>                                              | 1.346, -0.653                                                     | 0.655, -0.397                                                     |

<sup>a</sup>Goodness-of-fit  $S = [\sum w(F_o^2 - F_c^2)^2 / (n-p)]^{1/2}$ , where *n* is the number of reflections and *p* the number of parameters. <sup>b</sup> $R1 = \sum \|F_o\| - \|F_c\| / \sum \|F_o\|$ ,  $wR2 = [\sum [w(F_o^2 - F_c^2)^2] / \sum [w(F_o^2)^2]]^{1/2}$ .

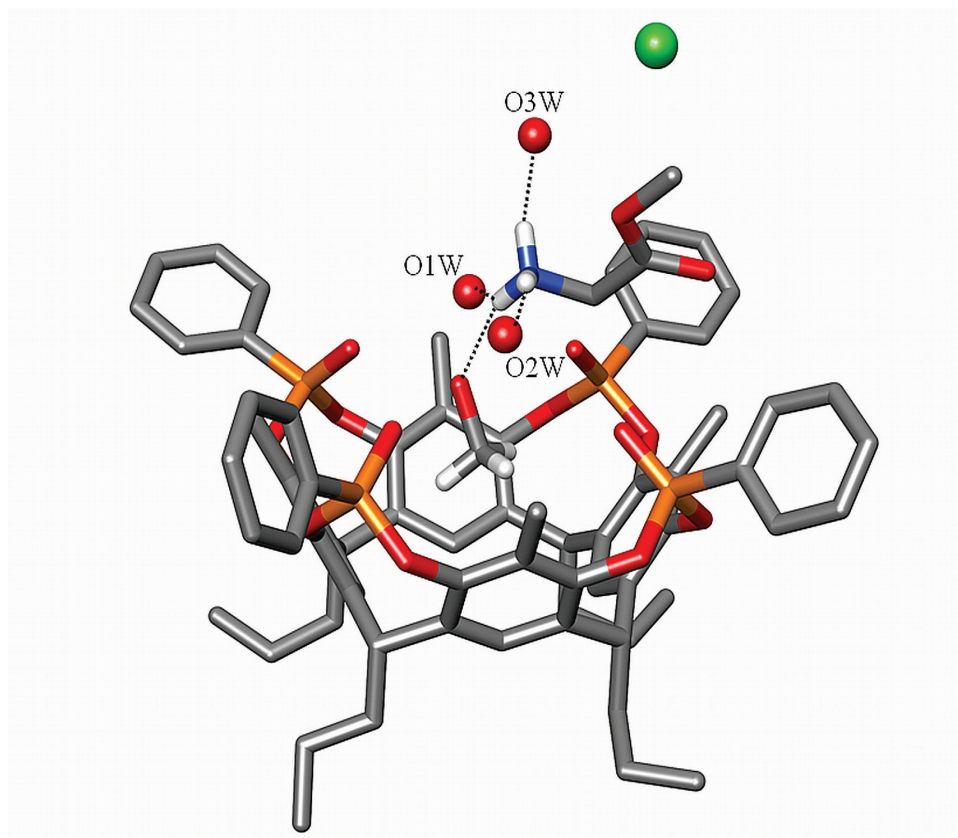

**Figure S1.** Molecular structure of complex  $\text{Ti(III)[C}_3\text{H}_7, \text{CH}_3, \text{Ph}] \cdot \text{CH}_3\text{OOCCH}_2\text{NH}_3\text{Cl} \cdot 3\text{CH}_3\text{OH} \cdot 3\text{H}_2\text{O}$  showing the network of hydrogen bonds involving the  $\text{NH}_3^+$  group of the amino acid, the methanol hosted inside the cavity and the three lattice water molecules. Geometrical parameters:  $\text{N1} \cdots \text{O1S}$ , 2.737(9) Å,  $\text{N1-H1H} \cdots \text{O1S}$ , 149.54(7)°;  $\text{N1} \cdots \text{O1W}$ , 2.870(9) Å,  $\text{N1-H1H} \cdots \text{O1W}$ , 129.23(5)°;  $\text{N1} \cdots \text{O2W}$ , 2.521(9) Å,  $\text{N1-H1G} \cdots \text{O2W}$ , 152.87(8)°;  $\text{N1} \cdots \text{O3W}$ , 2.872(9) Å,  $\text{N1-H1H} \cdots \text{O3W}$ , 162.39(8)°.

Color code: P, orange; O, red; N, blue; Cl, green; C: grey; H, white; hydrogen bonds, black dotted lines. The water molecules and the chloride ion are represented as balls.

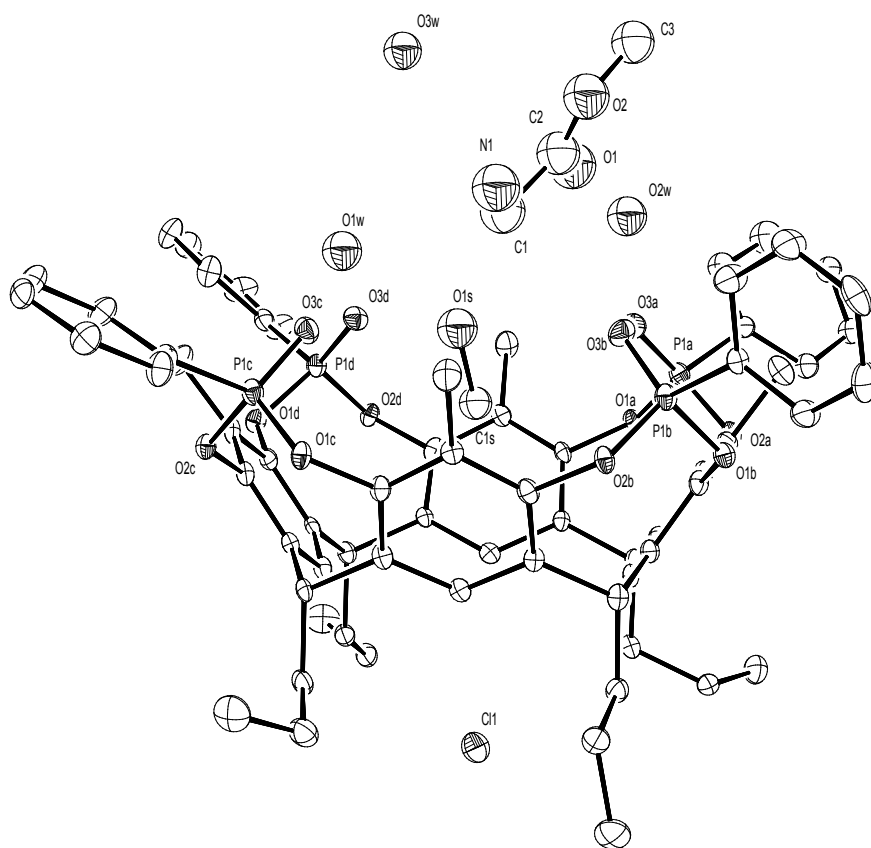

**Figure S2.** Ortep view (20% ellipsoid probability) of the molecular structure of compound **Ti<sup>III</sup>[C<sub>3</sub>H<sub>7</sub>, CH<sub>3</sub>, Ph]•CH<sub>3</sub>OOCCH<sub>2</sub>NH<sub>3</sub>Cl•3CH<sub>3</sub>OH•3H<sub>2</sub>O (1)**. Hydrogen atoms and disordered solvent molecules are omitted for clarity.

### **Description of the weak interactions in complex Ti<sup>III</sup>[C<sub>3</sub>H<sub>7</sub>, CH<sub>3</sub>, Ph]•CH<sub>3</sub>OOCCH<sub>2</sub>NH<sub>3</sub>Cl•3CH<sub>3</sub>OH•3H<sub>2</sub>O.**

The alcohol is stabilized within the cavity by a weak hydrogen bond with one P=O group at the upper rim [O3C...O1S, 3.055(9) Å] and by two CH- $\pi$  interactions between two methyl hydrogens of the guest and two aromatic rings of the host [C-H...centroid 2.780(4) and 3.052(5) Å; C-H...centroid 158.18(6) and 142.49(8)°]. O1W is involved in two hydrogen bonds with two adjacent PO groups [O1W...O3C, 2.795(9) and O1W...O3D, 2.710(9) Å] and the oxydrilic group of the methanol [O1W...O1S, 2.598(9) Å]; O2W forms a hydrogen bond with a third PO group [O2W...O3B, 2.894(9) Å] and O3W acts as intermediate between the NH<sub>3</sub><sup>+</sup> moiety and the chloride counterion [O3W...Cl1, 3.072(9) Å]. The distance between Cl<sup>-</sup> and the positive nitrogen of the guest is thus of 5.155(9) Å. At the same time, each chloride ion is found roughly in the middle of the four alkyl chains at the lower rim of the cavita<sup>nd</sup> situated above. The distance between the ion and the least square plane defined by the four  $\alpha$  CH<sub>2</sub> carbons is of 1.462(5) Å. This position is stabilized by C-H...Cl<sup>-</sup> interactions ranging in length from 2.866(1) to 3.008(2) Å.

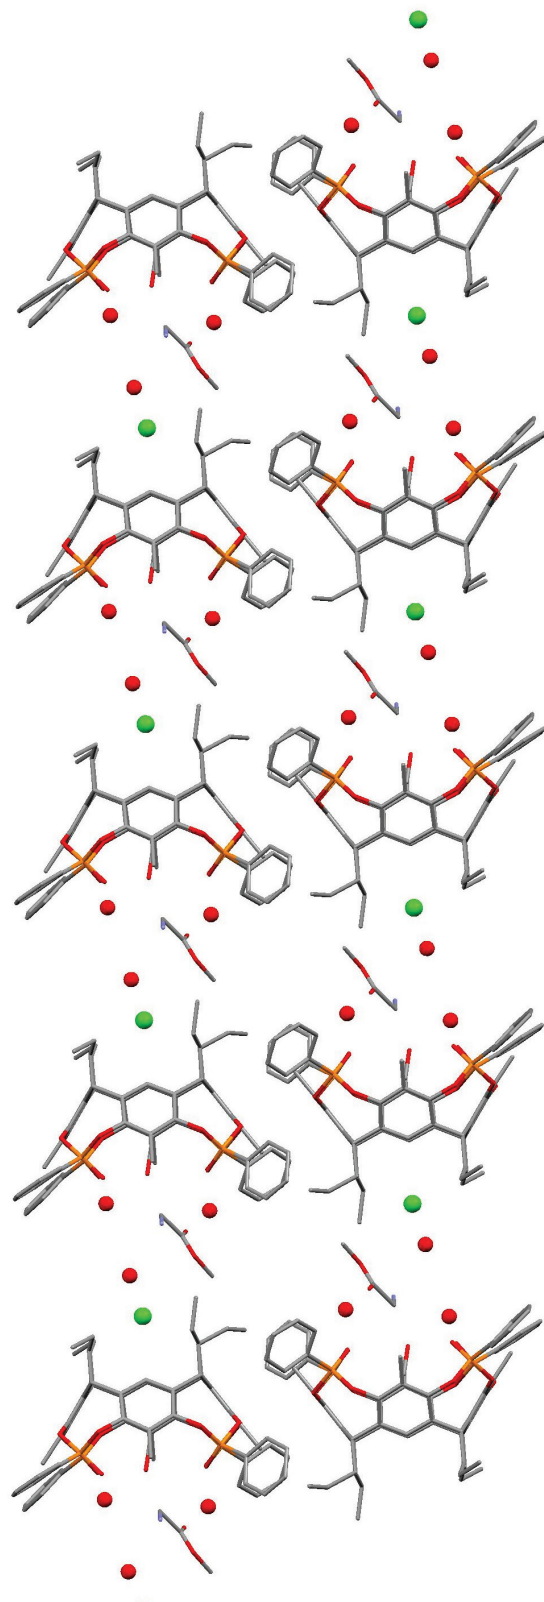

**Figure S3.** Columnar arrangement of complex **1** in the crystal lattice showing couples of “up-down” rows parallel to the crystallographic *a* axis.



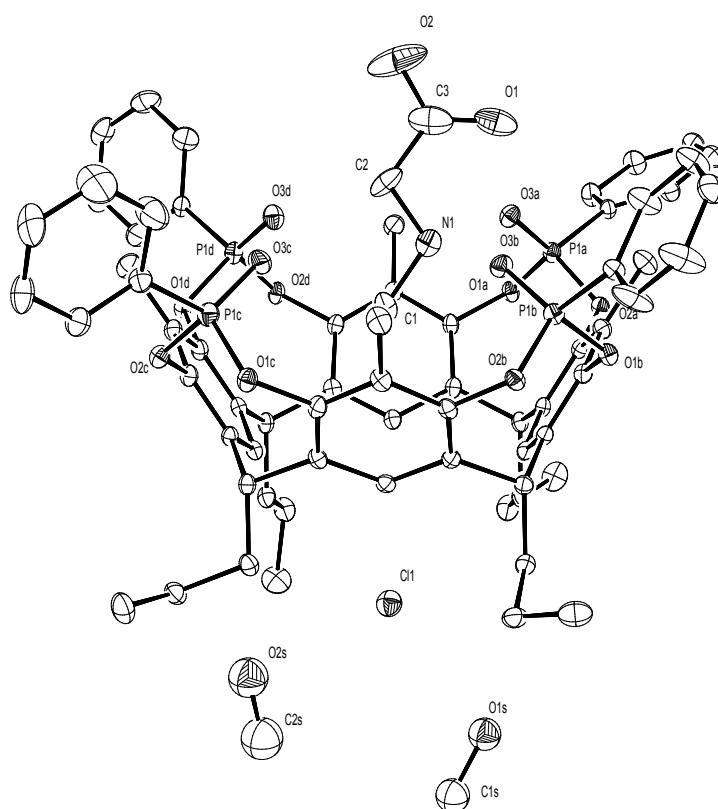

**Figure S4.** Ortep view (20% ellipsoid probability) of the molecular structure of compound  $\text{Ti(III)[C}_3\text{H}_7, \text{CH}_3, \text{Ph}] \cdot \text{HOOCCH}_2\text{NH}_2\text{CH}_3\text{Cl} \cdot 4\text{CH}_3\text{OH} \cdot \text{H}_2\text{O}$  (2). Hydrogen atoms and disordered solvent molecules are omitted for clarity.

**Description of the weak interactions in complex  $\text{Ti(III)[C}_3\text{H}_7, \text{CH}_3, \text{Ph}] \cdot \text{HOOCCH}_2\text{NH}_2\text{CH}_3\text{Cl} \cdot 4\text{CH}_3\text{OH} \cdot \text{H}_2\text{O}$ .**

Sarcosine enters the cavity with its methyl group forming two CH- $\pi$  interactions with two aromatic rings of the host [C-H $\cdots$ centroid 2.949(3) and 3.103(3) Å; C-H $\cdots$ centroid 142.29(6) and 117.22(6)°]. The complex is further stabilized by two hydrogen bonds involving the positively charged  $\text{NH}_2$  moiety and two adjacent P=O groups [N1 $\cdots$ O3A, 2.880(3) Å, N1-H1F $\cdots$ O3A, 175.08(3); N1 $\cdots$ O3B, 2.740(3) Å, N1-H1E $\cdots$ O3B, 162.96(5)°]. The chloride ion is located among the four alkyl chains at the lower rim of the cavitand, separated by a distance of 7.136(4) Å from the positive nitrogen atom. The distance between the ion and the least square plane defined by the four  $\alpha$   $\text{CH}_2$  carbons is of 1.488(3) Å. This position is stabilized by C-H $\cdots$ Cl $\cdots$  interactions ranging in length from 2.896(1) to 3.015(1) Å. The ion is also involved in two hydrogen bonds with two methanol molecules of the crystal lattice [Cl $\cdots$ O1S, 3.163(3); Cl $\cdots$ O2S, 3.162(5) Å]

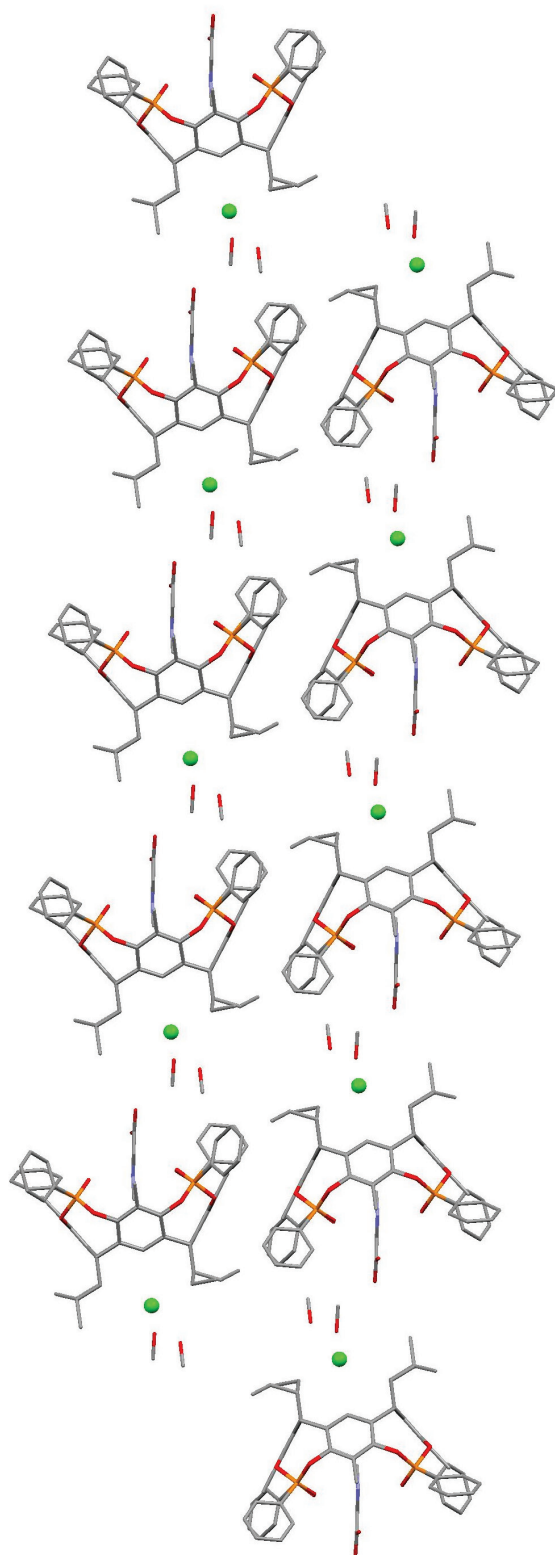

**Figure S5.** Columnar arrangement of complex **2** in the crystal lattice showing couples of “up-down” rows parallel to the crystallographic *a* axis.

**Job Plot,  $^1\text{H}$  NMR and  $^{31}\text{P}$  NMR of complex  $\text{Tiii}\cdot\text{sarcosine methyl ester}$ .**

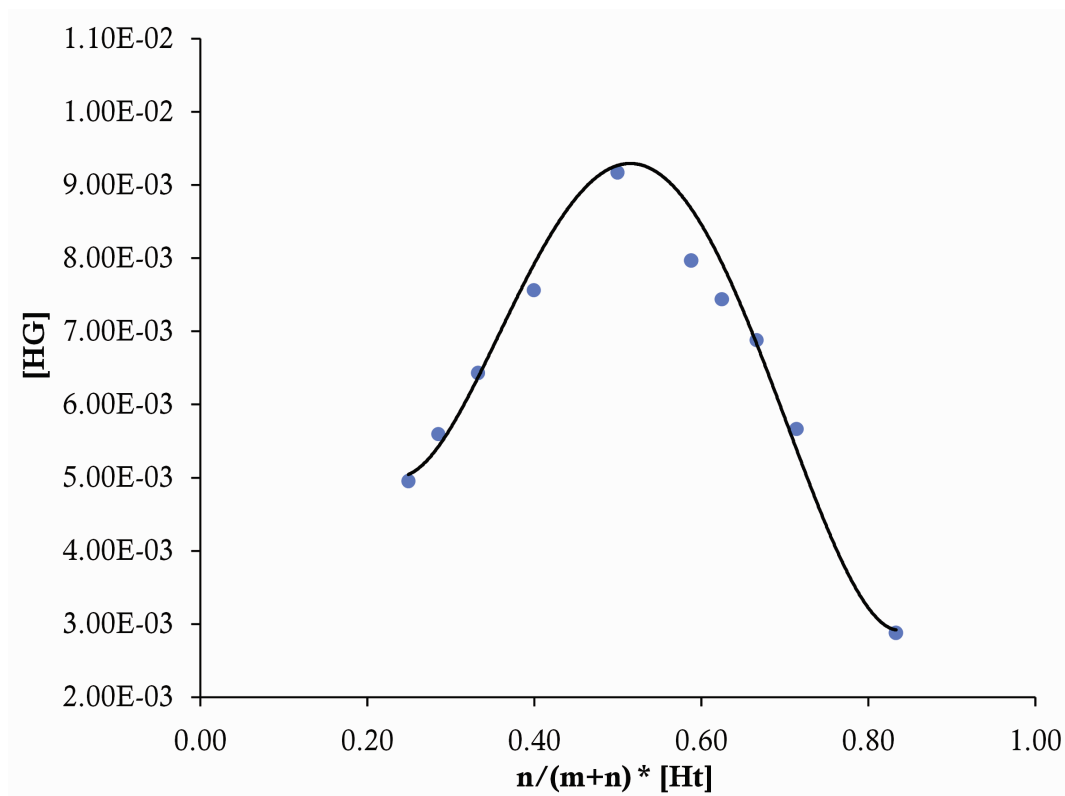

**Figure S6.** Job Plot for complexation of receptor  $\text{Tiii}[\text{C}_3\text{H}_7, \text{CH}_3, \text{Ph}]$  with sarcosine methyl ester hydrochloride determined in MeOD with  $^{31}\text{P}$  NMR by varying the mole fractions of the host and the guest,  $[\text{x}]+[\text{y}] = 1.59 \times 10^{-2}$  M. Integration ratios between complexed and uncomplexed phosphorous peak of  $\text{Tiii}[\text{C}_3\text{H}_7, \text{CH}_3, \text{Ph}]$  were utilized.

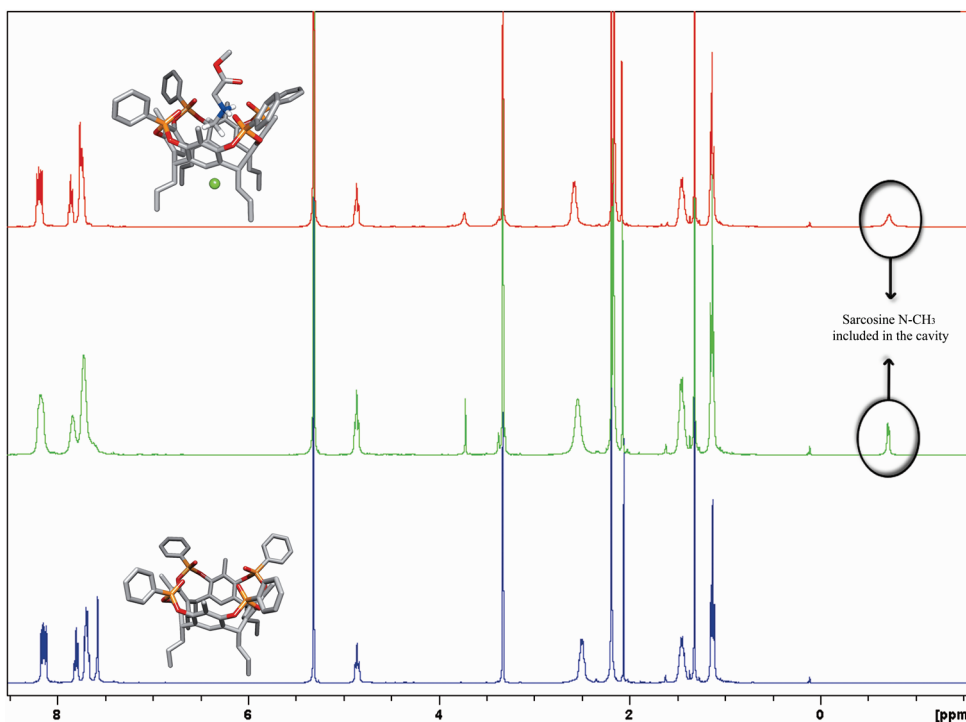

**Figure S7.**  $^1\text{H}$  NMR spectra (400 MHz, MeOD, 253K) of free  $\text{Ti}^{\text{III}}[\text{C}_3\text{H}_7, \text{CH}_3, \text{Ph}]$  (blue spectrum), 0.5eq. of sarcosine methyl ester hydrochloride added (green spectrum) and the 1:1 complex (red spectrum).

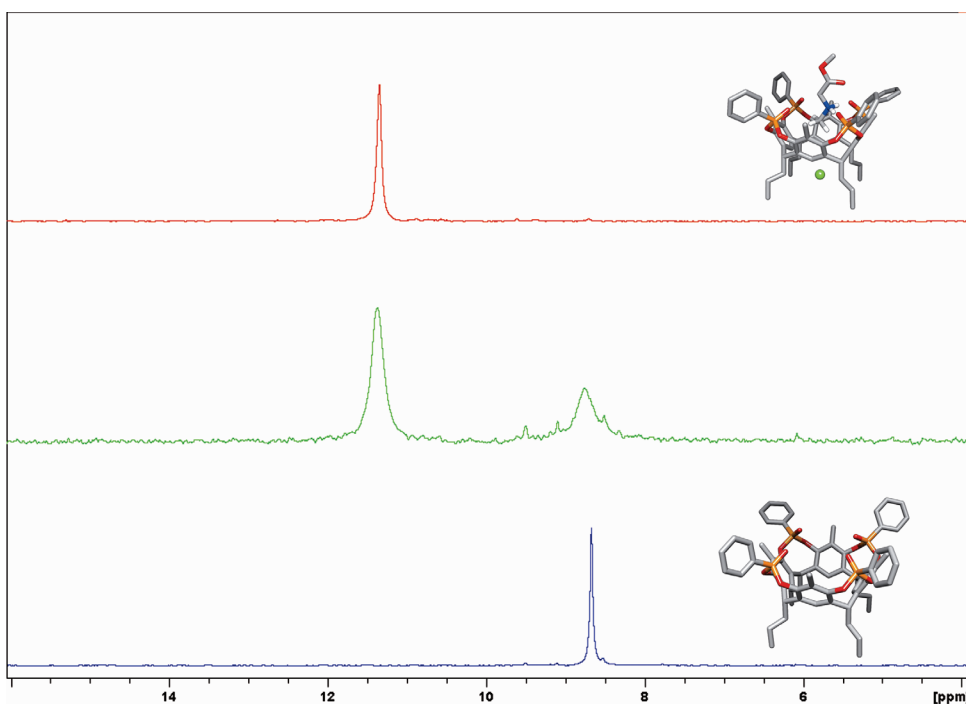

**Figure S8.**  $^{31}\text{P}$  NMR spectra (400 MHz, MeOD, 253K) of free  $\text{Ti}^{\text{III}}[\text{C}_3\text{H}_7, \text{CH}_3, \text{Ph}]$  (blue spectrum), plus 0.5eq. of sarcosine methyl ester hydrochloride (green spectrum) and the 1:1 complex (red spectrum).

## ITC measurements.

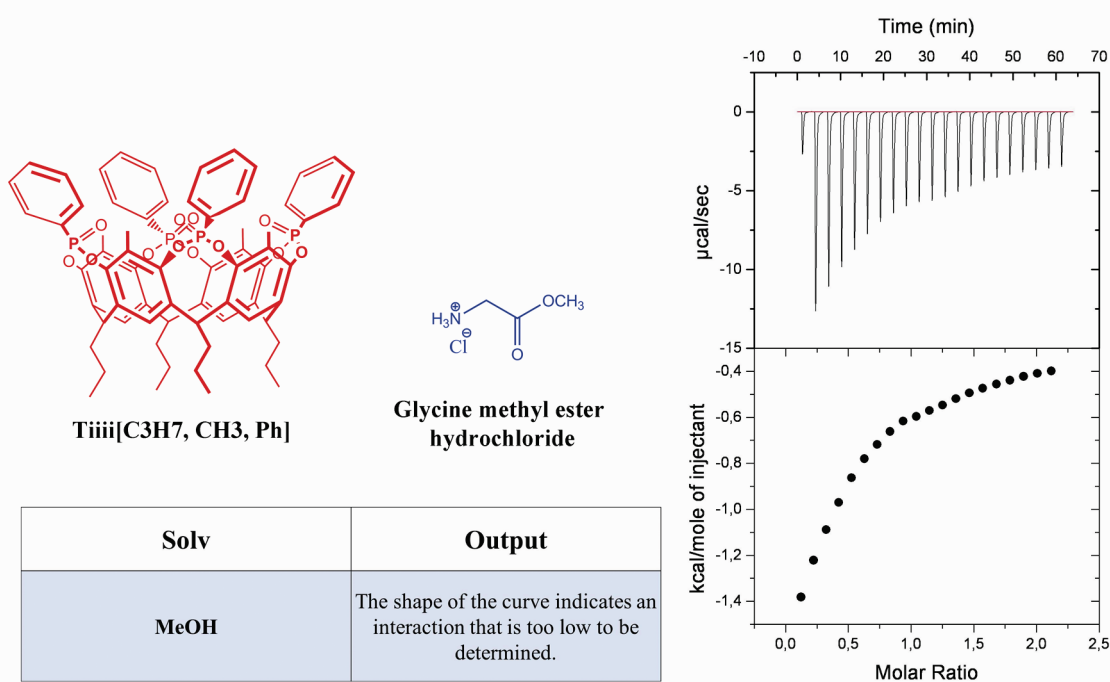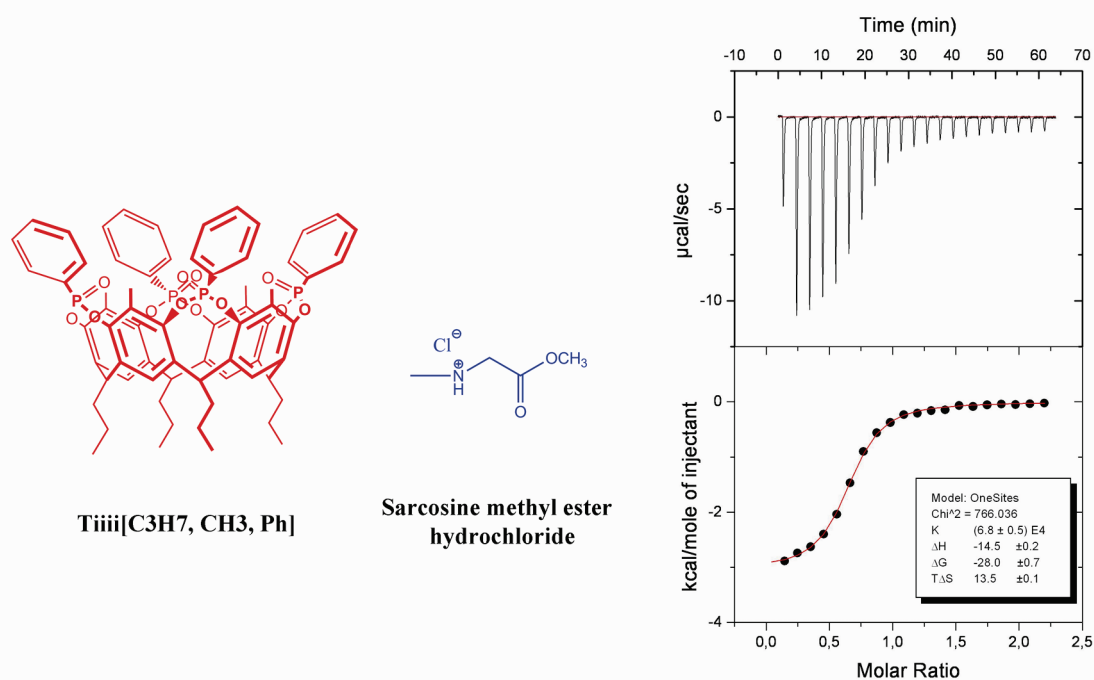

| Solv | $K_{\text{ass}} \pm \delta K_{\text{ass}}$<br>(M <sup>-1</sup> ) | $\Delta H \pm \delta H$<br>(KJ* $\text{mol}^{-1}$ ) | $\Delta G \pm \delta G$<br>(KJ* $\text{mol}^{-1}$ ) | $T\Delta S \pm T\delta S$<br>(KJ* $\text{mol}^{-1}$ ) |
|------|------------------------------------------------------------------|-----------------------------------------------------|-----------------------------------------------------|-------------------------------------------------------|
| MeOH | $6.8 \pm 0.5 \cdot 10^4$                                         | $-14.5 \pm 0.2$                                     | $-28.0 \pm 0.7$                                     | $13.5 \pm 0.1$                                        |

**Figure S9.** ITC data obtained with glycine methyl ester (top) and sarcosine methyl ester (bottom).

## Sarcosine complexation at the chloroform-water interface

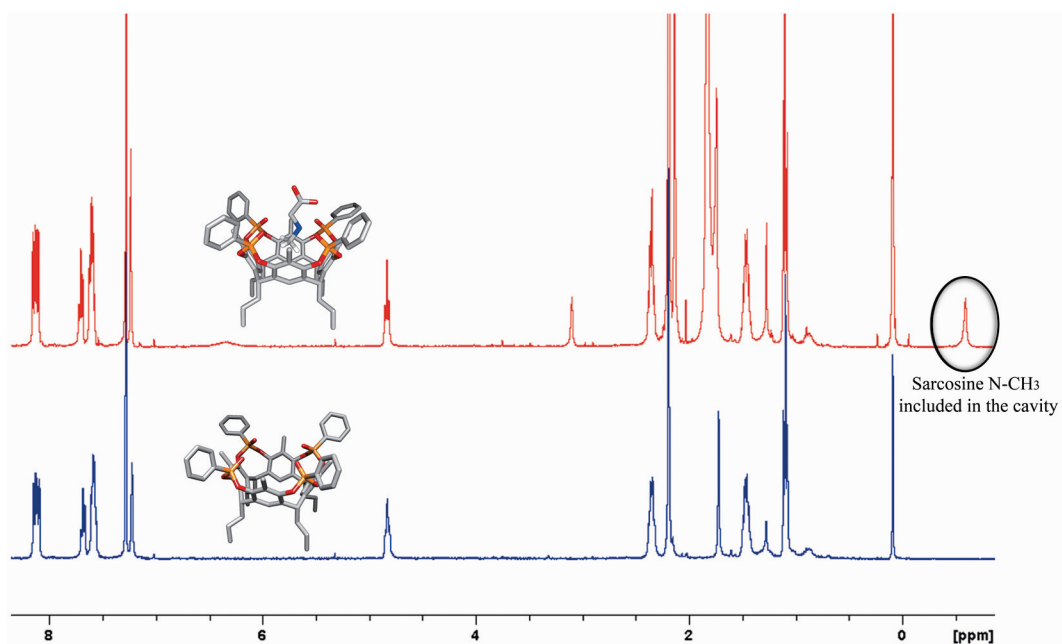

**Figure S10.** <sup>1</sup>H NMR spectra (400 MHz, CDCl<sub>3</sub> /D<sub>2</sub>O, 298K) of free **TiIII**[C<sub>3</sub>H<sub>7</sub>, CH<sub>3</sub>, Ph] (bottom) and the complex **TiIII**[C<sub>3</sub>H<sub>7</sub>, CH<sub>3</sub>, Ph]•sarcosine (top). 1eq. of sarcosine in D<sub>2</sub>O has been added to a 10 mM solution of **TiIII** in CDCl<sub>3</sub>/D<sub>2</sub>O.

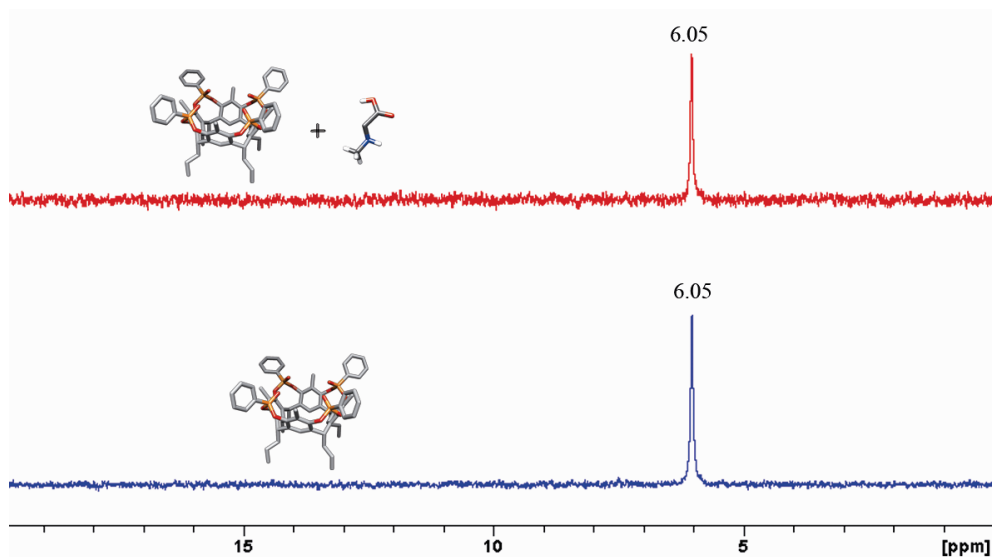

**Figure S11.** <sup>31</sup>P NMR spectra (161 MHz, CDCl<sub>3</sub>, 298K) of free **TiIII**[C<sub>3</sub>H<sub>7</sub>, CH<sub>3</sub>, Ph] (bottom) and the **TiIII**[C<sub>3</sub>H<sub>7</sub>, CH<sub>3</sub>, Ph] after addition of 1 eq of sarcosine as solid powder (top). Sarcosine has been added as solid powder to a 10 mM solution of **TiIII** in CDCl<sub>3</sub>.

## Solid sarcosine dissolution in chloroform upon complexation

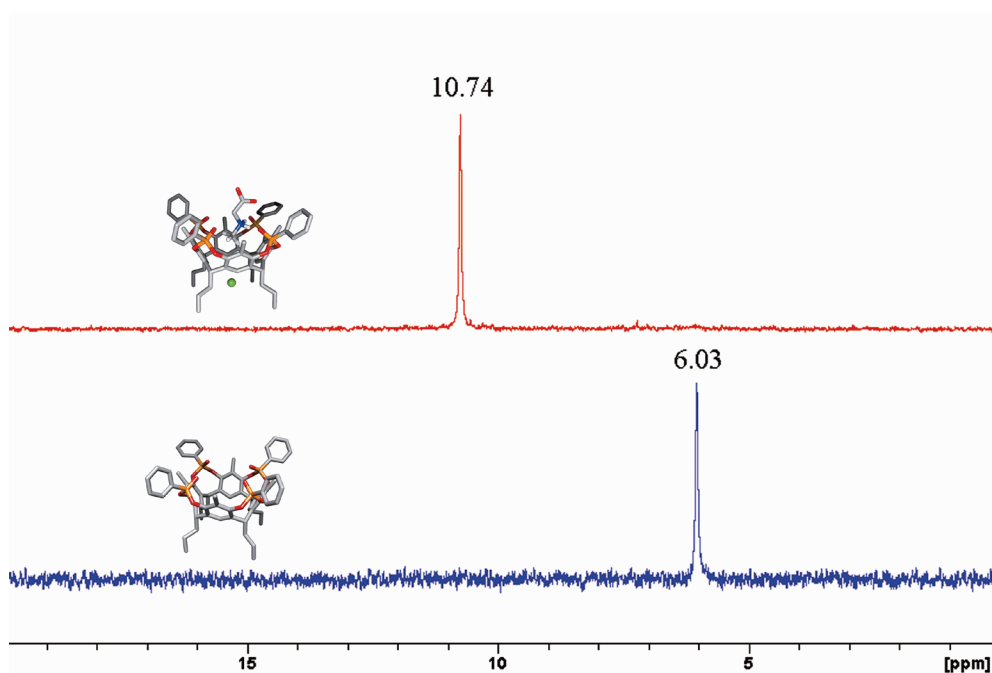

**Figure S12.**  $^{31}\text{P}$  NMR spectra (161 MHz,  $\text{CDCl}_3$ , 298K) of free  $\text{Ti}^{\text{III}}[\text{C}_3\text{H}_7, \text{CH}_3, \text{Ph}]$  (bottom) and the complex  $\text{Ti}^{\text{III}}[\text{C}_3\text{H}_7, \text{CH}_3, \text{Ph}] \cdot \text{sarcosine hydrochloride}$  (top). 1 eq of sarcosine hydrochloride has been added as solid powder to a 10 mM solution of  $\text{Ti}^{\text{III}}$  in  $\text{CDCl}_3$ .

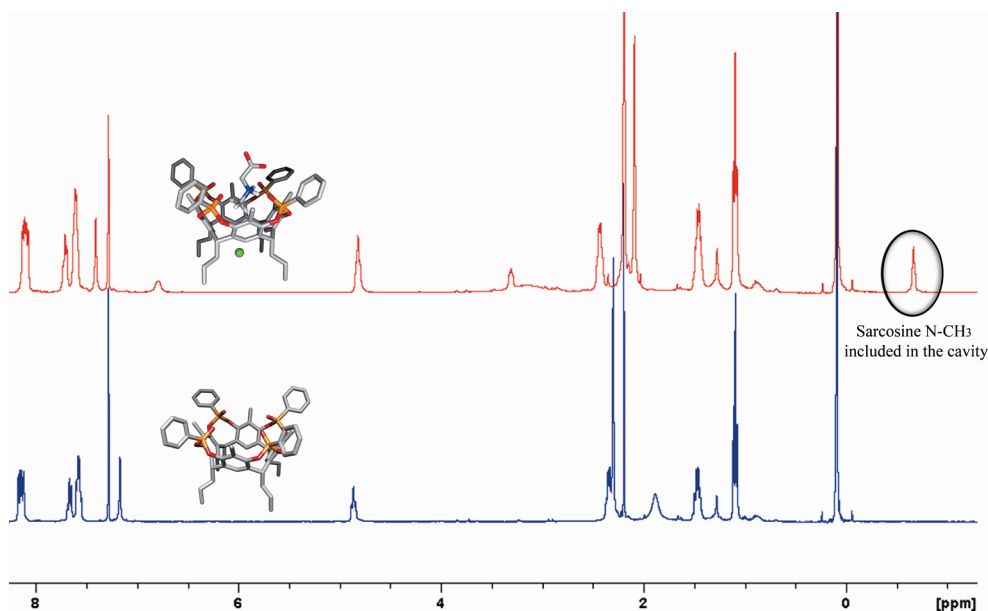

**Figure S13.**  $^1\text{H}$  NMR spectra (400 MHz,  $\text{CDCl}_3$ , 298K) of free  $\text{Ti}^{\text{III}}[\text{C}_3\text{H}_7, \text{CH}_3, \text{Ph}]$  (bottom) and the complex  $\text{Ti}^{\text{III}}[\text{C}_3\text{H}_7, \text{CH}_3, \text{Ph}] \cdot \text{sarcosine hydrochloride}$  (top). 1 eq of sarcosine hydrochloride has been added as solid powder to a 10 mM solution of  $\text{Ti}^{\text{III}}$  in  $\text{CDCl}_3$ .

## HR-ESI-MS for the complex $\text{Ti(III)[C}_3\text{H}_7, \text{CH}_3, \text{Ph}] \cdot \text{sarcosine}$ .

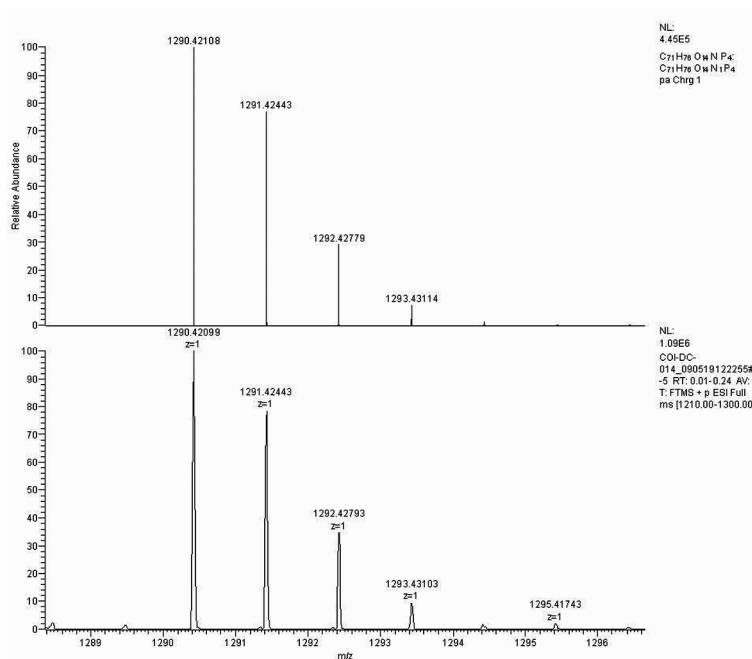

**Figure S14.** Simulated mass spectrum (top), acquired high resolution mass spectrum (bottom) for the complex  $\text{Ti(III)[C}_3\text{H}_7, \text{CH}_3, \text{Ph}] \cdot \text{sarcosine}$ .

### GC-SIM-MS analyses of urine samples containing sarcosine before and after filtration.

The urine samples added with 1mM and 0.1 mM sarcosine were analyzed to determine if filtration after sarcosine addition would lead to a change in sarcosine concentration in the filtered urine. To this purpose GC-SIM-MS (Gas Chromatography-Selected Ion Monitoring-Mass Spectrometry) was used, following a published procedure (9). In detail the sarcosine spiked urine samples (1mM and 0.1 mM) were added with norvaline (internal standard) and treated with hexyl chloroformate for amino acids derivatization. The samples were then divided in two portions, one filtered as described in the Materials and Methods section, and the other not filtered. GC-SIM-MS was performed on all four samples, two of them filtered and two not. The chromatograms and corresponding histograms are reported in Figure S15 for the 1mM concentration and in Figure S16 for the 0.1mM concentration. In both cases the filtration did not change the sarcosine concentration.



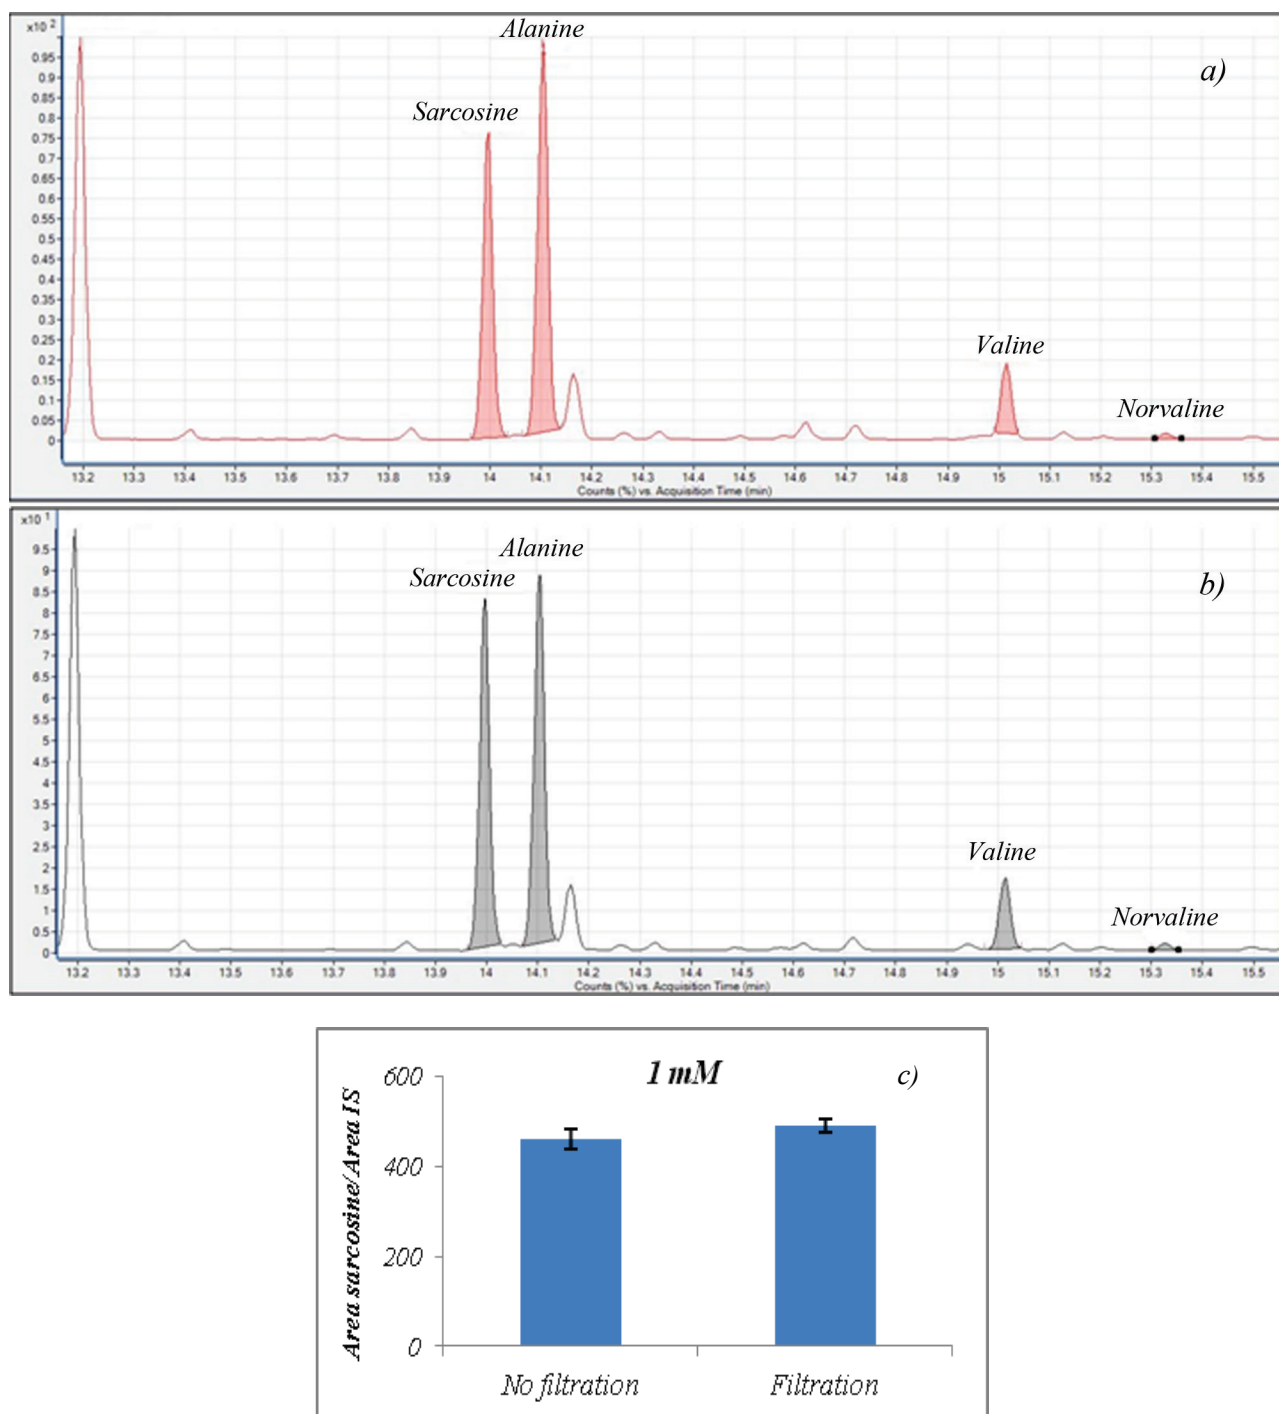

**Figure S15.** GC-SIM-MS chromatograms of a urinary sample spiked with 1 mM of sarcosine: a) after filtration; b) without filtration; c) histogram reporting the sarcosine peak area normalization with respect to the internal standard (norvaline).

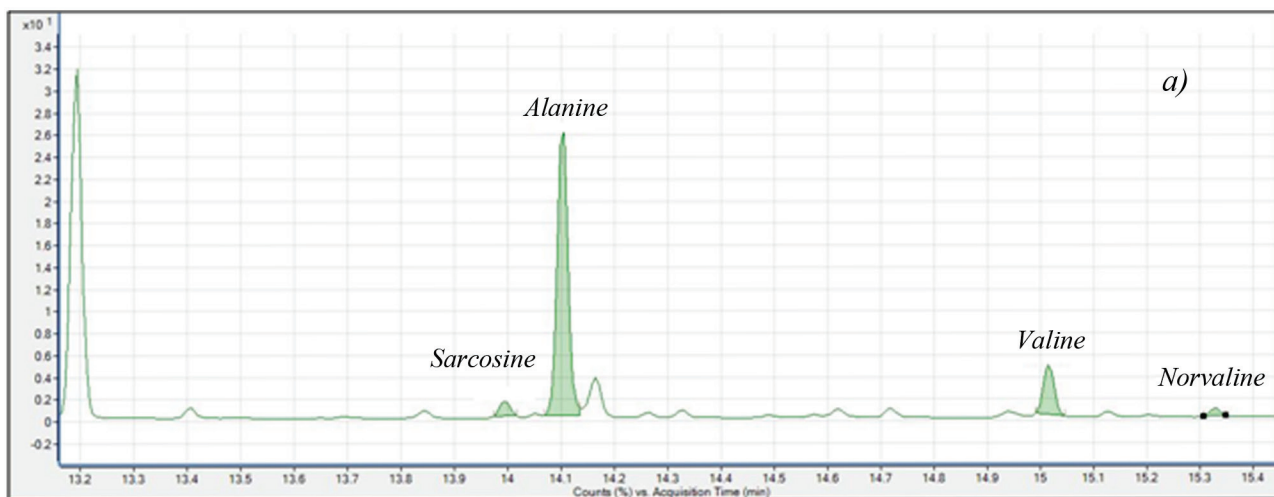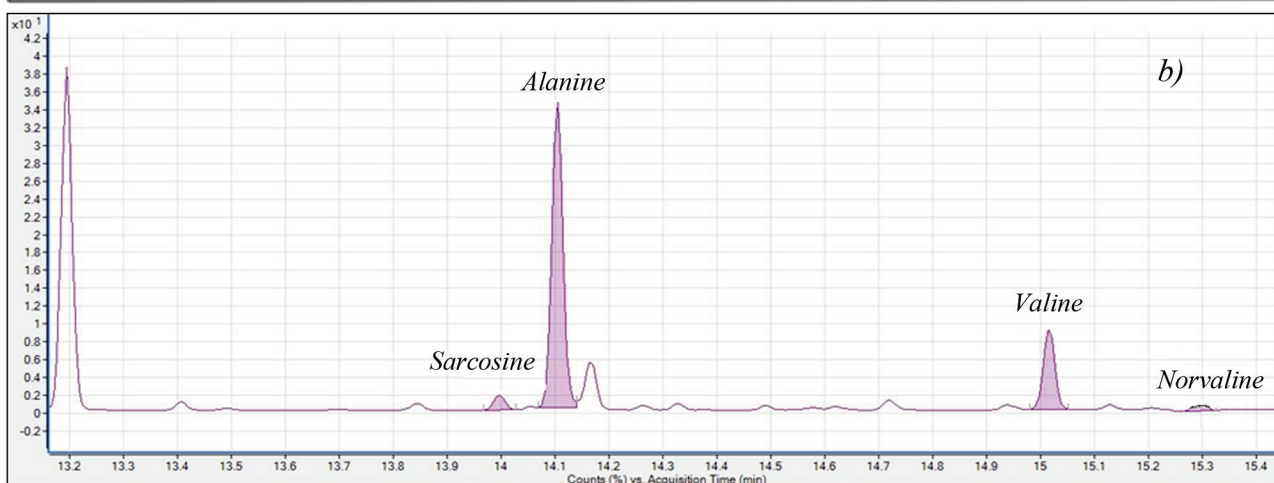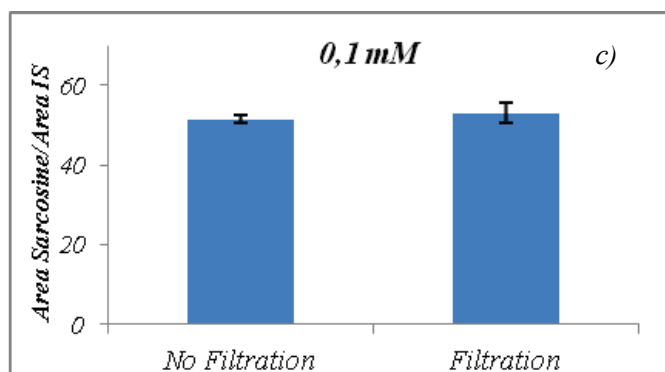

**Figure S16.** GC-SIM-MS chromatograms of a urinary sample spiked with 0.1 mM of sarcosine: a) after filtration; b) without filtration; c) histogram reporting the sarcosine peak area normalization with respect to the internal standard (norvaline).

## DFT Calculations.

DFT calculations have been performed to obtain geometric and energetic details on sarcosine and glycine adducts (both guests as protonated amino acids, Scheme S2) with  $\text{T}_{\text{iii}}[\text{C}_{10}\text{H}_{19}, \text{CH}_3, \text{Ph}]$ .

The difference in energy stabilization between  $\text{T}_{\text{iii}}\cdot\text{glycine}$  and  $\text{T}_{\text{iii}}\cdot\text{sarcosine}$  adducts is computed 3.8 kcal/mol and arises mainly from the CH- $\pi$  interaction.

Similar calculations have been performed exchanging the methyl groups on the apical positions of  $\text{T}_{\text{iii}}$  with hydride groups  $\text{T}_{\text{iii}}[\text{C}_{10}\text{H}_{19}, \text{H}, \text{Ph}]$ , in order to highlight the effect of the methyl groups of the cavity on the sarcosine/glycine selectivity. In this case, it was found a smaller energy difference between the two adducts (3.3 kcal/mol) with respect to adducts with  $\text{T}_{\text{iii}}[\text{C}_2\text{H}_5, \text{CH}_3, \text{Ph}]$ . The methyl groups donate electron density on the cavitand ring enhancing the CH- $\pi$  interactions, and hence, the sarcosine/glycine selectivity.

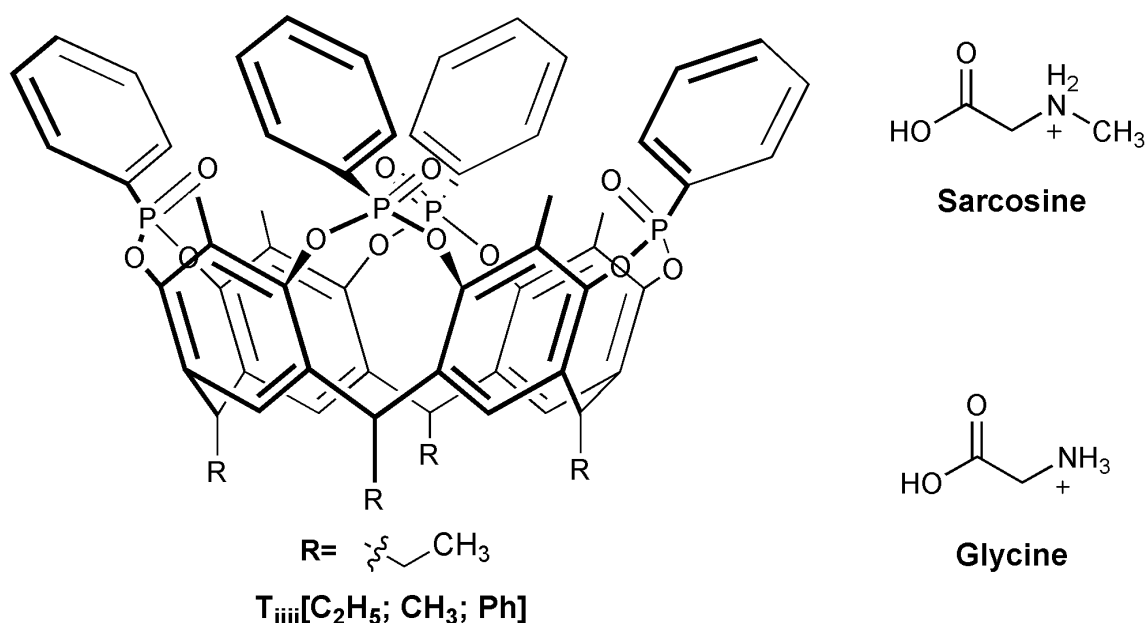

**Scheme S2.** Compounds taken into account for DFT calculations.

## Computational details

The Gaussian and plane wave mixed-basis method, as implemented in the QUICKSTEP module (10) within the CP2K simulation package (11), was used. A triple quality TZVP Gaussian basis set was employed for all the atoms. The dispersion correction of Grimme was added to take into account VdW interactions (12). The Goedecker-Teter-Hutter pseudopotentials (13) together with a 320 Ry plane wave cutoff were used to expand the densities obtained with the Perdew-Burke-Ernzerhof (PBE) (14) exchange-correlation density functional. Molecular geometry optimization of stationary points used the Broyden-Fletcher-Goldfarb-Shanno (BFGS) method.

Coordinates in Angstrom and relative energies in a.u. of all structures investigated by DFT calculations.

**T<sub>iiii</sub> [C<sub>2</sub>H<sub>5</sub>, H, Ph] E=-590.830788 a.u.**

|   |              |              |              |
|---|--------------|--------------|--------------|
| C | 9.277605587  | 6.664673958  | 12.205613789 |
| C | 8.167622468  | 7.556473220  | 11.665219049 |
| C | 10.609473006 | 7.016048426  | 11.549345366 |
| C | 7.417595095  | 7.167945201  | 10.542520321 |
| C | 7.866890233  | 8.801268428  | 12.233898885 |
| C | 11.009517067 | 6.392881703  | 10.356823866 |
| C | 11.482048003 | 7.969415513  | 12.092906710 |
| C | 6.415872168  | 7.975698755  | 10.012718254 |
| O | 7.661077484  | 5.932845381  | 9.909406532  |
| C | 6.866881763  | 9.648270035  | 11.736252105 |
| C | 12.217663622 | 6.696124633  | 9.735753221  |
| O | 10.209971486 | 5.402158200  | 9.755512565  |
| C | 12.714253156 | 8.300663185  | 11.511798418 |
| C | 6.153448439  | 9.204565756  | 10.611664669 |
| C | 6.582507261  | 11.013770416 | 12.352904576 |
| C | 13.057470238 | 7.638261522  | 10.321156516 |
| C | 13.643697753 | 9.343673391  | 12.119577081 |
| O | 5.136939114  | 10.001517244 | 10.045119395 |
| C | 7.470554473  | 12.075195289 | 11.714626108 |
| O | 14.291503655 | 7.884864957  | 9.686738384  |
| C | 13.321643293 | 10.719637786 | 11.547861806 |
| C | 7.051426402  | 12.771763041 | 10.568273075 |
| C | 8.736531243  | 12.394425532 | 12.224935414 |
| C | 13.955914639 | 11.180902954 | 10.383301100 |
| C | 12.356288179 | 11.556334881 | 12.125686197 |
| O | 5.787600751  | 12.528369543 | 9.994976622  |
| C | 7.846369620  | 13.743085550 | 9.967686427  |
| C | 9.569300779  | 13.369695995 | 11.658418799 |
| O | 14.945353028 | 10.406835261 | 9.742987718  |
| C | 13.639996742 | 12.411255945 | 9.815727745  |
| C | 12.009637659 | 12.806730306 | 11.595085604 |
| C | 9.090046797  | 14.036230821 | 10.519574629 |
| C | 10.945194783 | 13.693112255 | 12.232352307 |
| C | 12.674223636 | 13.206288937 | 10.423368474 |
| O | 9.856450999  | 15.042517831 | 9.895704754  |
| O | 12.391210810 | 14.446344817 | 9.817738958  |
| C | 13.652663117 | 9.315810738  | 13.659128333 |
| C | 6.671690846  | 11.006785931 | 13.891035336 |
| C | 9.348795355  | 6.663812082  | 13.744067806 |
| C | 10.978291024 | 13.649806276 | 13.772685641 |
| C | 14.710442735 | 10.258471696 | 14.241211775 |
| C | 10.003304820 | 14.652151554 | 14.397884038 |
| C | 5.653758901  | 10.051801954 | 14.521937321 |
| C | 10.364708639 | 5.644190065  | 14.267777464 |
| C | 4.172498564  | 11.589762551 | 8.047630338  |
| C | 3.064824507  | 12.238745948 | 8.615003015  |
| C | 4.197135361  | 11.266173583 | 6.680650427  |
| C | 1.976894746  | 12.569507595 | 7.800676825  |
| C | 3.099546192  | 11.592946693 | 5.877306657  |
| C | 1.994591072  | 12.247343972 | 6.436176274  |
| C | 11.384708267 | 15.936251786 | 7.808210003  |
| C | 12.229634470 | 16.977727722 | 8.221450759  |
| C | 10.828267980 | 15.926894569 | 6.517850468  |
| C | 12.518670062 | 18.016121272 | 7.329797011  |
| C | 11.115479689 | 16.975394701 | 5.638649628  |
| C | 11.962366707 | 18.015359438 | 6.043050818  |
| C | 15.807796968 | 8.851368469  | 7.673937868  |
| C | 15.739189848 | 9.254326649  | 6.329714268  |

|   |              |              |              |
|---|--------------|--------------|--------------|
| C | 16.917417993 | 8.142109543  | 8.158797229  |
| C | 16.796998818 | 8.950089565  | 5.466502850  |
| C | 17.965146787 | 7.836001191  | 7.285102765  |
| C | 17.906084581 | 8.239865375  | 5.943440494  |
| C | 8.586629415  | 4.457778839  | 7.821405730  |
| C | 8.231332792  | 4.677425364  | 6.480448673  |
| C | 8.681500503  | 3.157040284  | 8.339700425  |
| C | 7.958324205  | 3.581757255  | 5.654226292  |
| C | 8.410227880  | 2.069093047  | 7.504326640  |
| C | 8.046562702  | 2.280785152  | 6.166631651  |
| P | 8.931230304  | 5.926624245  | 8.812711784  |
| P | 5.662673650  | 11.194111270 | 8.989591490  |
| P | 11.035858861 | 14.493454355 | 8.837114213  |
| P | 14.367667887 | 9.230339976  | 8.695440999  |
| O | 10.686888662 | 13.221082948 | 8.119562072  |
| O | 6.891691551  | 10.845606055 | 8.200004759  |
| O | 9.133024878  | 7.222183329  | 8.081611494  |
| O | 13.099191142 | 9.591588227  | 7.977431837  |
| H | 9.037615551  | 5.633445325  | 11.895518458 |
| H | 8.439130940  | 9.127474666  | 13.104342782 |
| H | 11.194508255 | 8.466597170  | 13.021113777 |
| H | 5.872021690  | 7.668370369  | 9.120324187  |
| H | 12.491141917 | 6.218089807  | 8.795573382  |
| H | 5.541326359  | 11.268122521 | 12.091195846 |
| H | 14.665735319 | 9.094538837  | 11.787745315 |
| H | 9.087963358  | 11.865698482 | 13.112794343 |
| H | 11.851128726 | 11.216216595 | 13.031714383 |
| H | 7.510455438  | 14.249219049 | 9.063322861  |
| H | 14.118707508 | 12.732659493 | 8.891382700  |
| H | 11.173813563 | 14.730649657 | 11.934802291 |
| H | 13.844419077 | 8.276667907  | 13.975625497 |
| H | 12.658879363 | 9.579727730  | 14.059123364 |
| H | 6.504524789  | 12.038676471 | 14.242815486 |
| H | 7.688676327  | 10.731602784 | 14.218704983 |
| H | 8.339634826  | 6.436036776  | 14.126279238 |
| H | 9.599385058  | 7.669212555  | 14.123102444 |
| H | 12.011597369 | 13.864778870 | 14.093064926 |
| H | 10.749598696 | 12.633957806 | 14.137417793 |
| H | 15.712889446 | 9.993424216  | 13.864988508 |
| H | 14.730389636 | 10.206234764 | 15.341290579 |
| H | 10.225215679 | 15.676224417 | 14.053275794 |
| H | 10.067466087 | 14.637564979 | 15.497476461 |
| H | 4.628116624  | 10.324296172 | 14.221660035 |
| H | 5.709603000  | 10.079919070 | 15.621713947 |
| H | 10.110289751 | 4.630632532  | 13.915005029 |
| H | 10.385657851 | 5.629388426  | 15.368935649 |
| H | 3.066976891  | 12.498602928 | 9.675312908  |
| H | 5.082262558  | 10.781004200 | 6.261669239  |
| H | 1.118513911  | 13.087724126 | 8.231730231  |
| H | 3.113162276  | 11.347006870 | 4.813163732  |
| H | 1.147143501  | 12.514841406 | 5.801954519  |
| H | 12.674701860 | 16.956697604 | 9.217798348  |
| H | 10.200930732 | 15.087363484 | 6.208429968  |
| H | 13.192648013 | 18.817590792 | 7.637796797  |
| H | 10.691710605 | 16.971604493 | 4.632018164  |
| H | 12.199592973 | 18.820770441 | 5.345636985  |
| H | 14.851282744 | 9.781463828  | 5.972364920  |
| H | 16.946652858 | 7.816900731  | 9.200355875  |
| H | 16.749028550 | 9.256331686  | 4.419152823  |
| H | 18.823287883 | 7.270033456  | 7.651084919  |
| H | 18.724272914 | 7.992323365  | 5.263689927  |
| H | 8.185978206  | 5.700343407  | 6.098833213  |

|   |              |              |              |
|---|--------------|--------------|--------------|
| H | 8.975734562  | 3.001894227  | 9.379369526  |
| H | 7.683038497  | 3.744437286  | 4.609555298  |
| H | 8.486550025  | 1.054611554  | 7.898331832  |
| H | 7.836458740  | 1.426327766  | 5.518824594  |
| H | 5.836142028  | 9.016863126  | 14.190101025 |
| H | 8.966836318  | 14.418010936 | 14.106570312 |
| H | 14.505230120 | 11.299669898 | 13.944488342 |
| H | 11.376557223 | 5.882118333  | 13.901963970 |

**T<sub>iiii</sub> [C<sub>2</sub>H<sub>5</sub>, CH<sub>3</sub>, Ph]** E: -618.396256 a.u.

|   |              |              |              |
|---|--------------|--------------|--------------|
| C | 9.211988732  | 6.726187004  | 12.147999998 |
| C | 8.136154293  | 7.653637972  | 11.595468715 |
| C | 10.555445867 | 7.042587369  | 11.497039656 |
| C | 7.399772410  | 7.295612576  | 10.455947476 |
| C | 7.858951180  | 8.898161058  | 12.174050312 |
| C | 10.944475498 | 6.416294420  | 10.302996954 |
| C | 11.431022355 | 7.989204293  | 12.043619336 |
| C | 6.421140731  | 8.119275969  | 9.885439258  |
| O | 7.613533181  | 6.038707884  | 9.850682321  |
| C | 6.874000364  | 9.757738989  | 11.671503567 |
| C | 12.147962383 | 6.706890090  | 9.646033834  |
| O | 10.124592072 | 5.419012999  | 9.731512681  |
| C | 12.664930924 | 8.300588936  | 11.459768347 |
| C | 6.168889100  | 9.335163866  | 10.534335660 |
| C | 6.597249790  | 11.120153662 | 12.303347899 |
| C | 12.992716916 | 7.635989258  | 10.267633292 |
| C | 13.605091346 | 9.340675187  | 12.060501145 |
| O | 5.146251244  | 10.151220270 | 10.000282159 |
| C | 7.496700179  | 12.181331112 | 11.677174338 |
| O | 14.241897404 | 7.872296039  | 9.654483592  |
| C | 13.294845539 | 10.719854411 | 11.484082033 |
| C | 7.087402544  | 12.884741953 | 10.534330843 |
| C | 8.767732262  | 12.476237854 | 12.186675684 |
| C | 13.933520651 | 11.170949289 | 10.319514789 |
| C | 12.342709752 | 11.566591214 | 12.065969596 |
| O | 5.806881904  | 12.652248701 | 9.985223081  |
| C | 7.884461435  | 13.841677352 | 9.893290840  |
| C | 9.604367850  | 13.441917244 | 11.612495066 |
| O | 14.924380375 | 10.370843336 | 9.707514940  |
| C | 13.642200282 | 12.401121992 | 9.715722525  |
| C | 12.031817345 | 12.824879606 | 11.536260853 |
| C | 9.130811246  | 14.112998173 | 10.473644740 |
| C | 10.992148031 | 13.738731057 | 12.176562137 |
| C | 12.698511358 | 13.208399855 | 10.362218878 |
| O | 9.924096528  | 15.114795827 | 9.867300064  |
| O | 12.430671384 | 14.467851221 | 9.782611771  |
| C | 13.612223158 | 9.325022212  | 13.601102372 |
| C | 6.681499195  | 11.095680887 | 13.841258101 |
| C | 9.269412672  | 6.730909712  | 13.687983474 |
| C | 11.034388897 | 13.698315651 | 13.716243494 |
| C | 14.670583255 | 10.270817200 | 14.176777619 |
| C | 10.095572544 | 14.733885584 | 14.341828863 |
| C | 5.659964350  | 10.131717573 | 14.452293373 |
| C | 10.245868811 | 5.681301886  | 14.227792637 |
| C | 4.162083372  | 11.770481395 | 8.044532932  |
| C | 3.086911461  | 12.454803823 | 8.633032124  |
| C | 4.139522023  | 11.424000740 | 6.683701587  |
| C | 1.981797867  | 12.795058806 | 7.846933749  |
| C | 3.026332447  | 11.763338178 | 5.907824613  |
| C | 1.952317004  | 12.450289676 | 6.487954514  |
| C | 11.467722343 | 15.982948340 | 7.775328989  |
| C | 12.409966279 | 16.953662336 | 8.149256008  |

|   |              |              |              |
|---|--------------|--------------|--------------|
| C | 10.844654611 | 16.030747193 | 6.516555310  |
| C | 12.732247074 | 17.975409960 | 7.249724162  |
| C | 11.165099439 | 17.063232676 | 5.630130041  |
| C | 12.112152157 | 18.029558863 | 5.994140790  |
| C | 15.821105483 | 8.790098633  | 7.679549887  |
| C | 15.868311799 | 9.307132738  | 6.374442963  |
| C | 16.836083685 | 7.945955256  | 8.157144007  |
| C | 16.945505638 | 8.979944558  | 5.544417526  |
| C | 17.902596461 | 7.615396646  | 7.315080767  |
| C | 17.957313014 | 8.131822946  | 6.012871748  |
| C | 8.450040678  | 4.407333656  | 7.872086466  |
| C | 8.285754389  | 4.507707676  | 6.481466297  |
| C | 8.287068119  | 3.178039840  | 8.530575704  |
| C | 7.952245255  | 3.364913312  | 5.745037210  |
| C | 7.950945113  | 2.043569075  | 7.785966998  |
| C | 7.783179008  | 2.136683456  | 6.396609319  |
| P | 8.868930709  | 5.926176041  | 8.756014404  |
| P | 5.662260508  | 11.348529866 | 8.955619193  |
| P | 11.083030177 | 14.548148124 | 8.803358531  |
| P | 14.358057570 | 9.201080906  | 8.656343527  |
| O | 10.700957365 | 13.287580638 | 8.079217113  |
| O | 6.874585535  | 11.001895033 | 8.136869767  |
| O | 9.124579982  | 7.152912680  | 7.925659010  |
| O | 13.116300244 | 9.581204995  | 7.898838670  |
| H | 8.942593064  | 5.701975051  | 11.840163152 |
| H | 8.426492766  | 9.207113227  | 13.053377017 |
| H | 11.144280966 | 8.496343651  | 12.966034280 |
| H | 5.558866106  | 11.384651548 | 12.043082754 |
| H | 14.625112767 | 9.081784381  | 11.730990892 |
| H | 9.117795469  | 11.936298948 | 13.067927449 |
| H | 11.827490569 | 11.235143154 | 12.968967020 |
| H | 11.241672892 | 14.770139556 | 11.875855161 |
| H | 13.800212121 | 8.288031518  | 13.927439461 |
| H | 12.618873394 | 9.596279601  | 13.997348598 |
| H | 6.512392448  | 12.123172188 | 14.205260289 |
| H | 7.697186354  | 10.817311737 | 14.170293749 |
| H | 8.249202556  | 6.539933734  | 14.061617297 |
| H | 9.551678456  | 7.728853962  | 14.064324273 |
| H | 12.076545235 | 13.880639932 | 14.028828747 |
| H | 10.775978055 | 12.691542754 | 14.086153685 |
| H | 15.675145070 | 9.996555816  | 13.813222914 |
| H | 14.681343305 | 10.235327240 | 15.277706290 |
| H | 10.358098015 | 15.749518702 | 14.001018322 |
| H | 10.153163097 | 14.713569120 | 15.441653538 |
| H | 4.636553332  | 10.408548355 | 14.148366099 |
| H | 5.707909169  | 10.142849833 | 15.552690808 |
| H | 9.961884374  | 4.674160472  | 13.879132745 |
| H | 10.256431255 | 5.674111812  | 15.329186479 |
| H | 3.127984776  | 12.732171376 | 9.687959061  |
| H | 5.000396661  | 10.911567424 | 6.247417176  |
| H | 1.148500231  | 13.340584818 | 8.293633550  |
| H | 3.002275063  | 11.501457193 | 4.847707674  |
| H | 1.093371719  | 12.727051097 | 5.873732540  |
| H | 12.900835149 | 16.889780674 | 9.121817710  |
| H | 10.140659626 | 15.244414753 | 6.233619525  |
| H | 13.478671418 | 18.722630037 | 7.526485814  |
| H | 10.688095529 | 17.103855624 | 4.648394439  |
| H | 12.376544954 | 18.819384623 | 5.288423204  |
| H | 15.051244332 | 9.938260656  | 6.016253732  |
| H | 16.774500765 | 7.536983348  | 9.167085049  |
| H | 16.987206400 | 9.374563371  | 4.526751075  |
| H | 18.686634400 | 6.945175650  | 7.673089436  |

|   |              |              |              |
|---|--------------|--------------|--------------|
| H | 18.784922984 | 7.861996216  | 5.353626517  |
| H | 8.424193313  | 5.476697881  | 5.995656081  |
| H | 8.425001343  | 3.114049448  | 9.611694059  |
| H | 7.823471835  | 3.434566193  | 4.662702813  |
| H | 7.818580176  | 1.086225396  | 8.292435461  |
| H | 7.520230009  | 1.247672334  | 5.818969150  |
| H | 5.845825992  | 9.102575545  | 14.105366169 |
| H | 9.052978087  | 14.539310296 | 14.043066165 |
| H | 14.472541454 | 11.308504940 | 13.863458516 |
| H | 11.267888622 | 5.885076451  | 13.869776844 |
| C | 12.492926535 | 6.099894999  | 8.315640279  |
| H | 13.580931775 | 5.988863173  | 8.204258023  |
| H | 12.005665067 | 5.122894364  | 8.190933646  |
| H | 12.133385434 | 6.770020809  | 7.515316934  |
| C | 14.258165045 | 12.799433517 | 8.404459917  |
| H | 15.262183051 | 12.364983689 | 8.296387087  |
| H | 13.625740334 | 12.415451702 | 7.584846445  |
| H | 14.315025756 | 13.893112265 | 8.311931970  |
| C | 7.443211941  | 14.483271609 | 8.608164432  |
| H | 7.666183832  | 13.794096677 | 7.774701217  |
| H | 6.359009545  | 14.667774152 | 8.614431381  |
| H | 7.978348485  | 15.427088592 | 8.436089678  |
| C | 5.730878722  | 7.739871980  | 8.606158234  |
| H | 6.369386335  | 8.040495862  | 7.757348556  |
| H | 5.580887404  | 6.651909562  | 8.551329985  |
| H | 4.763650308  | 8.252689461  | 8.514021784  |

**Glycine** E= -56.676346 a.u.

|   |              |              |              |
|---|--------------|--------------|--------------|
| C | 9.733720487  | 10.553569818 | 10.130830578 |
| H | 10.177722982 | 11.560402458 | 10.125971395 |
| H | 8.649379987  | 10.639362494 | 10.287736750 |
| N | 10.328134810 | 9.784646105  | 11.304648056 |
| H | 9.962160763  | 8.817048032  | 11.328848608 |
| H | 11.356069902 | 9.710167556  | 11.209687776 |
| C | 10.001215984 | 9.873952491  | 8.787393361  |
| O | 9.496986073  | 10.255924084 | 7.762169613  |
| O | 10.868237736 | 8.827437420  | 8.941162459  |
| H | 11.028660116 | 8.415733906  | 8.060351828  |
| H | 10.108096314 | 10.245532153 | 12.204002087 |

**Sarcosine** E=-63.560257 a.u.

|   |              |              |              |
|---|--------------|--------------|--------------|
| C | 9.710644334  | 10.561243304 | 9.519223809  |
| H | 10.150946053 | 11.570017601 | 9.508266177  |
| H | 8.623690530  | 10.654158434 | 9.656028302  |
| N | 10.275732368 | 9.822972116  | 10.714099850 |
| H | 9.937190960  | 8.846741607  | 10.693365958 |
| H | 11.300992753 | 9.752925104  | 10.603182057 |
| C | 9.928061091  | 10.467660837 | 12.034898703 |
| H | 10.369362236 | 9.870080936  | 12.843263702 |
| H | 10.338263638 | 11.485889313 | 12.037607734 |
| H | 8.834272979  | 10.494602380 | 12.125535831 |
| C | 10.001929223 | 9.870088951  | 8.188287089  |
| O | 9.514348836  | 10.235171649 | 7.148268717  |
| O | 10.873878173 | 8.829753187  | 8.367224333  |
| H | 11.054932539 | 8.416070015  | 7.491898902  |

**T<sub>iiii</sub>[C<sub>2</sub>H<sub>5</sub>, H, Ph]•glycine adduct** E=-647.653125

|   |              |             |              |
|---|--------------|-------------|--------------|
| C | 9.276616108  | 6.665802608 | 12.214484112 |
| C | 8.166172879  | 7.558348064 | 11.674557172 |
| C | 10.601787881 | 7.028541098 | 11.552083086 |



|   |              |              |              |
|---|--------------|--------------|--------------|
| C | 7.408788530  | 7.173850785  | 10.556334215 |
| C | 7.865782235  | 8.803014568  | 12.246069486 |
| C | 10.999097504 | 6.416165132  | 10.353100114 |
| C | 11.476780106 | 7.979333191  | 12.098675887 |
| C | 6.399771375  | 7.974272216  | 10.034096833 |
| O | 7.651107073  | 5.944179514  | 9.905017510  |
| C | 6.862838453  | 9.649868418  | 11.752818355 |
| C | 12.201598963 | 6.728491125  | 9.724207650  |
| O | 10.205892180 | 5.421412351  | 9.749905699  |
| C | 12.705426321 | 8.319717124  | 11.513580702 |
| C | 6.140905900  | 9.202904786  | 10.634250883 |
| C | 6.584077428  | 11.015960461 | 12.371229020 |
| C | 13.040356643 | 7.669500890  | 10.313639473 |
| C | 13.643607850 | 9.347913972  | 12.132270881 |
| O | 5.130493969  | 9.996012756  | 10.060529121 |
| C | 7.478879316  | 12.066923311 | 11.724553237 |
| O | 14.272622953 | 7.910277015  | 9.676220659  |
| C | 13.331059967 | 10.726548882 | 11.561811150 |
| C | 7.065162413  | 12.753160619 | 10.570038951 |
| C | 8.744015691  | 12.391328576 | 12.235834572 |
| C | 13.982301232 | 11.200971214 | 10.413220785 |
| C | 12.358613436 | 11.560024099 | 12.133160364 |
| O | 5.803028081  | 12.513637926 | 9.996578531  |
| C | 7.863945246  | 13.711707106 | 9.955744831  |
| C | 9.582653766  | 13.356023482 | 11.657520511 |
| O | 14.968682295 | 10.422948334 | 9.764950215  |
| C | 13.685155436 | 12.438956545 | 9.853982388  |
| C | 12.023709049 | 12.816485774 | 11.610152922 |
| C | 9.108642241  | 14.003265299 | 10.504591143 |
| C | 10.951146863 | 13.695487295 | 12.241288025 |
| C | 12.709841791 | 13.228052163 | 10.455339271 |
| O | 9.870154602  | 15.000882376 | 9.864806909  |
| O | 12.422794942 | 14.462919677 | 9.847529600  |
| C | 13.645932987 | 9.320641600  | 13.672876070 |
| C | 6.674104915  | 11.007198237 | 13.909375480 |
| C | 9.352564400  | 6.662547767  | 13.753444900 |
| C | 10.980109382 | 13.652358116 | 13.782388054 |
| C | 14.707561830 | 10.257745373 | 14.256023594 |
| C | 10.000748592 | 14.653734817 | 14.400635091 |
| C | 5.653201443  | 10.051633592 | 14.534450817 |
| C | 10.370786890 | 5.644402992  | 14.275113190 |
| C | 4.218717633  | 11.575820296 | 8.026458415  |
| C | 3.105761941  | 12.219620338 | 8.593261715  |
| C | 4.253319873  | 11.247619519 | 6.660827482  |
| C | 2.017621213  | 12.535197407 | 7.775247487  |
| C | 3.154963448  | 11.566083912 | 5.854907486  |
| C | 2.042037489  | 12.209153164 | 6.411396104  |
| C | 11.407511600 | 15.879516116 | 7.784139512  |
| C | 12.239441555 | 16.934984769 | 8.194190063  |
| C | 10.832843879 | 15.862854338 | 6.501582975  |
| C | 12.501284540 | 17.977931814 | 7.301400834  |
| C | 11.094957070 | 16.918489385 | 5.623218742  |
| C | 11.931758577 | 17.969056618 | 6.020710290  |
| C | 15.778230370 | 8.875327152  | 7.656140691  |
| C | 15.706344472 | 9.292904987  | 6.316060611  |
| C | 16.880877175 | 8.148029717  | 8.135492814  |
| C | 16.758114109 | 8.980608019  | 5.448909826  |
| C | 17.920806135 | 7.838161605  | 7.254897512  |
| C | 17.860031689 | 8.253629042  | 5.917448390  |
| C | 8.587585255  | 4.510084400  | 7.792478823  |
| C | 8.220614960  | 4.736071331  | 6.455718124  |
| C | 8.691108992  | 3.207919736  | 8.310957154  |

|   |              |              |              |
|---|--------------|--------------|--------------|
| C | 7.950492380  | 3.639169624  | 5.630467268  |
| C | 8.419213581  | 2.122563049  | 7.473953820  |
| C | 8.049350047  | 2.337418635  | 6.138435659  |
| P | 8.917701228  | 5.933072153  | 8.829987503  |
| P | 5.669255861  | 11.178530332 | 9.006464837  |
| P | 11.083062662 | 14.469738783 | 8.849505634  |
| P | 14.390255076 | 9.265541125  | 8.721172347  |
| O | 10.780160199 | 13.138015768 | 8.201527707  |
| O | 6.937767038  | 10.795979356 | 8.281159642  |
| O | 9.133866227  | 7.268966544  | 8.143989302  |
| O | 13.095462186 | 9.668522146  | 8.041579990  |
| H | 9.040485074  | 5.634057136  | 11.903939691 |
| H | 8.435667235  | 9.125997264  | 13.119276830 |
| H | 11.199125811 | 8.458475791  | 13.038856248 |
| H | 5.843529368  | 7.662185341  | 9.150724299  |
| H | 12.484705151 | 6.238452035  | 8.792599007  |
| H | 5.544193083  | 11.275189997 | 12.109997622 |
| H | 14.664812602 | 9.090553616  | 11.804136524 |
| H | 9.082937072  | 11.886032773 | 13.141907208 |
| H | 11.841793094 | 11.215403851 | 13.030461915 |
| H | 7.523710692  | 14.218467165 | 9.052969026  |
| H | 14.182284748 | 12.772408686 | 8.943391404  |
| H | 11.170965078 | 14.734790769 | 11.943798986 |
| H | 13.829868626 | 8.280932325  | 13.991121519 |
| H | 12.652880394 | 9.592390186  | 14.069314994 |
| H | 6.505859423  | 12.038334172 | 14.262576187 |
| H | 7.691190470  | 10.732158637 | 14.238473445 |
| H | 8.344637100  | 6.431358712  | 14.135740237 |
| H | 9.599815271  | 7.668301029  | 14.133712418 |
| H | 12.012246149 | 13.870875160 | 14.103684736 |
| H | 10.755022011 | 12.635697213 | 14.148172709 |
| H | 15.709633964 | 9.989521147  | 13.882897404 |
| H | 14.724535140 | 10.201682066 | 15.355104811 |
| H | 10.222597020 | 15.676409677 | 14.053413334 |
| H | 10.062158367 | 14.643556906 | 15.499696032 |
| H | 4.629397632  | 10.324946001 | 14.229847515 |
| H | 5.703611488  | 10.080150039 | 15.633781584 |
| H | 10.119372771 | 4.629807139  | 13.924290378 |
| H | 10.388923708 | 5.630523811  | 15.375763413 |
| H | 3.099737711  | 12.481942340 | 9.652774725  |
| H | 5.138010797  | 10.763527395 | 6.240853555  |
| H | 1.151973534  | 13.044309946 | 8.202020911  |
| H | 3.171682815  | 11.318350521 | 4.791739463  |
| H | 1.190766552  | 12.463324583 | 5.776743844  |
| H | 12.689557416 | 16.927147863 | 9.188364936  |
| H | 10.203949801 | 15.024011827 | 6.194873075  |
| H | 13.160183921 | 18.793087352 | 7.604463176  |
| H | 10.654664335 | 16.915131758 | 4.624260348  |
| H | 12.146401243 | 18.781527142 | 5.324235037  |
| H | 14.830157408 | 9.841734657  | 5.963337713  |
| H | 16.915555012 | 7.817116562  | 9.174813227  |
| H | 16.714624938 | 9.298648025  | 4.405287432  |
| H | 18.775759707 | 7.263097308  | 7.612606437  |
| H | 18.673144631 | 8.004070415  | 5.233047913  |
| H | 8.156678116  | 5.757338104  | 6.073375269  |
| H | 8.991582816  | 3.048140005  | 9.348151751  |
| H | 7.663958290  | 3.801105166  | 4.589550206  |
| H | 8.499233030  | 1.107354066  | 7.864903074  |
| H | 7.840378333  | 1.484512765  | 5.489162735  |
| H | 5.835386094  | 9.015480460  | 14.206227220 |
| H | 8.965023592  | 14.417467286 | 14.108743352 |
| H | 14.508974280 | 11.301725819 | 13.965514273 |

|   |              |              |              |
|---|--------------|--------------|--------------|
| H | 11.385006480 | 5.882467057  | 13.915888074 |
| C | 9.803956183  | 10.417489125 | 7.108653041  |
| H | 10.235245350 | 11.429670685 | 7.064242896  |
| H | 8.715132555  | 10.513415673 | 7.238283083  |
| N | 10.359380242 | 9.734105665  | 8.323057460  |
| H | 9.945360809  | 8.764979617  | 8.402169199  |
| H | 11.414659436 | 9.667280748  | 8.271616747  |
| H | 10.103910998 | 10.289858845 | 9.151886392  |
| C | 10.087569763 | 9.695464002  | 5.814157619  |
| O | 9.592019274  | 10.031559509 | 4.753636704  |
| O | 10.960012963 | 8.652811212  | 5.956882865  |
| H | 11.069955243 | 8.258693206  | 5.064263213  |

**T<sub>iiii</sub>[C<sub>2</sub>H<sub>5</sub>, H, Ph]•sarcosine adduct** E= -654.542345

|   |              |              |              |
|---|--------------|--------------|--------------|
| C | 9.279505875  | 6.559031030  | 12.499464960 |
| C | 8.168950007  | 7.446640332  | 11.952590154 |
| C | 10.603316501 | 6.923457482  | 11.836219370 |
| C | 7.415145755  | 7.057245665  | 10.833644576 |
| C | 7.866989653  | 8.692555887  | 12.519426364 |
| C | 10.995602816 | 6.323668968  | 10.629038978 |
| C | 11.478584289 | 7.871728931  | 12.386712377 |
| C | 6.409196789  | 7.858656243  | 10.305038521 |
| O | 7.654894153  | 5.818692376  | 10.195734096 |
| C | 6.861429824  | 9.535359726  | 12.025773636 |
| C | 12.191672658 | 6.651687402  | 9.994754615  |
| O | 10.212970098 | 5.317242346  | 10.030596975 |
| C | 12.701437951 | 8.224948676  | 11.797385899 |
| C | 6.141841541  | 9.085574665  | 10.906668654 |
| C | 6.576877813  | 10.898095962 | 12.647402729 |
| C | 13.032705417 | 7.588542658  | 10.588870949 |
| C | 13.633791889 | 9.256949222  | 12.417375808 |
| O | 5.120710851  | 9.870338789  | 10.339342230 |
| C | 7.469109773  | 11.950975234 | 12.002141735 |
| O | 14.265595645 | 7.829911660  | 9.955252608  |
| C | 13.316940607 | 10.635071585 | 11.847012612 |
| C | 7.056580758  | 12.631355395 | 10.844011414 |
| C | 8.730618176  | 12.280460208 | 12.516686757 |
| C | 13.969473404 | 11.114104133 | 10.701414116 |
| C | 12.340896071 | 11.464253631 | 12.417122852 |
| O | 5.792042990  | 12.389686451 | 10.276598407 |
| C | 7.854443517  | 13.592188247 | 10.229641014 |
| C | 9.564955775  | 13.250023943 | 11.941760691 |
| O | 14.963805116 | 10.342599986 | 10.057765967 |
| C | 13.669205081 | 12.352580762 | 10.143804012 |
| C | 12.005142533 | 12.721768160 | 11.897897775 |
| C | 9.094435887  | 13.894287879 | 10.785689446 |
| C | 10.929212591 | 13.594729503 | 12.531051847 |
| C | 12.691147778 | 13.139105434 | 10.744672187 |
| O | 9.850873622  | 14.904448140 | 10.160134783 |
| O | 12.409904111 | 14.381059300 | 10.146829616 |
| C | 13.632364533 | 9.230412977  | 13.958097143 |
| C | 6.666209506  | 10.884853142 | 14.185445614 |
| C | 9.351620467  | 6.566169800  | 14.038560662 |
| C | 10.955165678 | 13.542487349 | 14.071746360 |
| C | 14.682796065 | 10.179513628 | 14.541925112 |
| C | 9.980084409  | 14.542328482 | 14.699095987 |
| C | 5.653129086  | 9.919063990  | 14.807727995 |
| C | 10.374357753 | 5.556770910  | 14.567244022 |
| C | 4.191171560  | 11.462789938 | 8.311185963  |
| C | 3.076496995  | 12.106159080 | 8.874720323  |
| C | 4.238124824  | 11.150229824 | 6.941896736  |
| C | 1.999364914  | 12.438414538 | 8.048999911  |

|   |              |              |              |
|---|--------------|--------------|--------------|
| C | 3.150107818  | 11.484167535 | 6.128802974  |
| C | 2.036182227  | 12.128326361 | 6.681689571  |
| C | 11.387582941 | 15.840819944 | 8.108104854  |
| C | 12.197482433 | 16.905548782 | 8.535401636  |
| C | 10.810161656 | 15.833982439 | 6.826589252  |
| C | 12.428828076 | 17.972689811 | 7.663298431  |
| C | 11.043506163 | 16.911721265 | 5.967320514  |
| C | 11.853800868 | 17.975410595 | 6.384917239  |
| C | 15.795873988 | 8.797037957  | 7.953177224  |
| C | 15.715779341 | 9.186863849  | 6.605325071  |
| C | 16.906238523 | 8.089767669  | 8.443684755  |
| C | 16.766376103 | 8.865230587  | 5.740243755  |
| C | 17.944426880 | 7.768183893  | 7.565668528  |
| C | 17.874286795 | 8.154157987  | 6.219173673  |
| C | 8.584642416  | 4.368466650  | 8.084059852  |
| C | 8.222756341  | 4.609187975  | 6.747937246  |
| C | 8.679337975  | 3.063099367  | 8.593258332  |
| C | 7.948330893  | 3.522210644  | 5.912064656  |
| C | 8.404971137  | 1.988015257  | 7.744567545  |
| C | 8.039878629  | 2.216328299  | 6.409939681  |
| P | 8.913423849  | 5.797715919  | 9.110323053  |
| P | 5.643948018  | 11.059049935 | 9.284150800  |
| P | 11.076145806 | 14.407064174 | 9.141835916  |
| P | 14.397472247 | 9.188257873  | 9.003714578  |
| O | 10.785140646 | 13.091725208 | 8.458552226  |
| O | 6.905546291  | 10.681911113 | 8.545352638  |
| O | 9.113113693  | 7.117235843  | 8.390894880  |
| O | 13.112665565 | 9.591166986  | 8.307970114  |
| H | 9.046555840  | 5.525060339  | 12.193820246 |
| H | 8.436937459  | 9.019601679  | 13.390988429 |
| H | 11.203726220 | 8.341319290  | 13.332206429 |
| H | 5.853919785  | 7.543626693  | 9.422075604  |
| H | 12.472033758 | 6.171332847  | 9.057243823  |
| H | 5.536417828  | 11.153923070 | 12.385734825 |
| H | 14.656655157 | 9.003634303  | 12.091118548 |
| H | 9.068911863  | 11.776230169 | 13.423373074 |
| H | 11.822788395 | 11.116103852 | 13.312260837 |
| H | 7.514463219  | 14.097881325 | 9.325986534  |
| H | 14.171525539 | 12.690214571 | 9.237632300  |
| H | 11.146048954 | 14.635929396 | 12.238620504 |
| H | 13.826446475 | 8.192701503  | 14.278371704 |
| H | 12.635309916 | 9.493047584  | 14.351502457 |
| H | 6.489806883  | 11.913477016 | 14.541702043 |
| H | 7.685265019  | 10.616944634 | 14.514072380 |
| H | 8.344427666  | 6.330721648  | 14.420161528 |
| H | 9.591586235  | 7.575870678  | 14.413669964 |
| H | 11.987686745 | 13.754916178 | 14.396321089 |
| H | 10.725711162 | 12.524346200 | 14.430466053 |
| H | 15.689756507 | 9.915193603  | 14.179045211 |
| H | 14.690044026 | 10.132675676 | 15.641526369 |
| H | 10.214754118 | 15.569143989 | 14.374007380 |
| H | 10.032564219 | 14.510638050 | 15.798176415 |
| H | 4.627102429  | 10.183558308 | 14.503212697 |
| H | 5.701974633  | 9.946430674  | 15.907043131 |
| H | 10.131931926 | 4.540731937  | 14.214775224 |
| H | 10.386857950 | 5.543567277  | 15.667835542 |
| H | 3.061108859  | 12.357033931 | 9.936847116  |
| H | 5.124649450  | 10.667177387 | 6.524806211  |
| H | 1.133612715  | 12.949734119 | 8.472593445  |
| H | 3.176022507  | 11.248797977 | 5.063054167  |
| H | 1.193413797  | 12.396510050 | 6.041634852  |
| H | 12.652050602 | 16.887526043 | 9.526996431  |

|   |              |              |              |
|---|--------------|--------------|--------------|
| H | 10.202661374 | 14.984401500 | 6.505808471  |
| H | 13.067448611 | 18.798415310 | 7.980468715  |
| H | 10.601866016 | 16.915438116 | 4.968692057  |
| H | 12.045784509 | 18.806123722 | 5.703564839  |
| H | 14.833012732 | 9.720802525  | 6.246329836  |
| H | 16.947518459 | 7.782439611  | 9.490070666  |
| H | 16.715871594 | 9.161592751  | 4.690561495  |
| H | 18.804532466 | 7.206320264  | 7.931978359  |
| H | 18.685956322 | 7.894121153  | 5.536848615  |
| H | 8.165171608  | 5.634584994  | 6.376479640  |
| H | 8.971749904  | 2.892577869  | 9.630992596  |
| H | 7.663366685  | 3.694377316  | 4.872228657  |
| H | 8.477385615  | 0.970741831  | 8.127696651  |
| H | 7.826183405  | 1.370287373  | 5.753425814  |
| H | 5.845040028  | 8.885384557  | 14.477963067 |
| H | 8.944295585  | 14.321898950 | 14.395023643 |
| H | 14.478723973 | 11.219551781 | 14.240743341 |
| H | 11.388332398 | 5.802158158  | 14.212828639 |
| C | 9.818028446  | 10.265349834 | 7.436646124  |
| H | 10.250666997 | 11.278453062 | 7.422965135  |
| H | 8.730170058  | 10.362767389 | 7.572685879  |
| N | 10.372014062 | 9.538890010  | 8.621570982  |
| H | 9.991586278  | 8.557647217  | 8.608255168  |
| H | 11.419963403 | 9.489437708  | 8.538977031  |
| C | 9.995900158  | 10.197622669 | 9.913391389  |
| H | 10.424912511 | 9.604410101  | 10.731594471 |
| H | 10.399804034 | 11.218117020 | 9.913022197  |
| H | 8.900089719  | 10.222357652 | 9.979863572  |
| C | 10.091140160 | 9.583075464  | 6.116219543  |
| O | 9.592702211  | 9.942754755  | 5.064899486  |
| O | 10.963702363 | 8.533866108  | 6.227233818  |
| H | 11.068426592 | 8.163745827  | 5.323876660  |

**T<sub>iiii</sub>[C<sub>2</sub>H<sub>5</sub>, CH<sub>3</sub>, Ph]•glycine adduct** E= -675.218942

|   |              |              |              |
|---|--------------|--------------|--------------|
| C | 9.243214707  | 6.727846965  | 12.248197816 |
| C | 8.142105766  | 7.627007177  | 11.695284397 |
| C | 10.572195654 | 7.068529471  | 11.579431893 |
| C | 7.381979095  | 7.238824854  | 10.580625174 |
| C | 7.864643160  | 8.882568469  | 12.252121167 |
| C | 10.961731203 | 6.444760819  | 10.384218335 |
| C | 11.447312925 | 8.021208251  | 12.118739822 |
| C | 6.384636940  | 8.039597774  | 10.012101037 |
| O | 7.620004456  | 5.983095374  | 9.967633513  |
| C | 6.870462066  | 9.729112691  | 11.744050689 |
| C | 12.157830648 | 6.741969299  | 9.715367977  |
| O | 10.148694531 | 5.438330735  | 9.816022506  |
| C | 12.678076480 | 8.337413880  | 11.528683264 |
| C | 6.150388967  | 9.277024715  | 10.627692822 |
| C | 6.601702226  | 11.105279912 | 12.348406519 |
| C | 13.000280911 | 7.677599671  | 10.331829512 |
| C | 13.625895558 | 9.362871981  | 12.140519288 |
| O | 5.146269414  | 10.087988585 | 10.059177261 |
| C | 7.511146011  | 12.146220331 | 11.702702233 |
| O | 14.247305339 | 7.908691809  | 9.709877392  |
| C | 13.326798874 | 10.744692685 | 11.564892886 |
| C | 7.108155813  | 12.831719051 | 10.545099585 |
| C | 8.776391244  | 12.453697069 | 12.220908834 |
| C | 13.985968193 | 11.207077147 | 10.416599641 |
| C | 12.361053471 | 11.586252437 | 12.132281159 |
| O | 5.834942776  | 12.584570785 | 9.990731150  |
| C | 7.905457798  | 13.784394109 | 9.899148146  |
| C | 9.615069693  | 13.415329291 | 11.640136158 |

|   |              |              |              |
|---|--------------|--------------|--------------|
| O | 14.971255332 | 10.398925945 | 9.798671497  |
| C | 13.710924920 | 12.440594618 | 9.814767083  |
| C | 12.050776385 | 12.843504255 | 11.597259632 |
| C | 9.147463673  | 14.060903365 | 10.485554550 |
| C | 10.989340076 | 13.743489592 | 12.219506181 |
| C | 12.741604174 | 13.234987921 | 10.439773677 |
| O | 9.935299908  | 15.050856325 | 9.859365907  |
| O | 12.458470969 | 14.476610819 | 9.834777537  |
| C | 13.625304077 | 9.344413057  | 13.681652661 |
| C | 6.682772635  | 11.110311416 | 13.887501267 |
| C | 9.318931800  | 6.752703097  | 13.787732769 |
| C | 11.015421443 | 13.715055357 | 13.760385381 |
| C | 14.701891592 | 10.268356665 | 14.258836807 |
| C | 10.048963174 | 14.736590908 | 14.365973165 |
| C | 5.645066171  | 10.177461608 | 14.518128127 |
| C | 10.330254749 | 5.739308040  | 14.331562311 |
| C | 4.244913840  | 11.651254150 | 8.017906078  |
| C | 3.137791120  | 12.311927174 | 8.576869350  |
| C | 4.264378206  | 11.284287535 | 6.662062754  |
| C | 2.040254007  | 12.603830299 | 7.762092193  |
| C | 3.157812133  | 11.579183690 | 5.858538299  |
| C | 2.050150566  | 12.237549933 | 6.408090581  |
| C | 11.459671093 | 15.880341334 | 7.748270484  |
| C | 12.319338815 | 16.926007819 | 8.124193300  |
| C | 10.853163253 | 15.859245489 | 6.480243234  |
| C | 12.573876753 | 17.956005923 | 7.213515066  |
| C | 11.109667940 | 16.899964244 | 5.582304331  |
| C | 11.970327543 | 17.943513462 | 5.948025001  |
| C | 15.764788387 | 8.860633089  | 7.681050952  |
| C | 15.728857499 | 9.372776855  | 6.372742317  |
| C | 16.831178320 | 8.057026290  | 8.119735776  |
| C | 16.777151281 | 9.077600900  | 5.495597143  |
| C | 17.869518078 | 7.766092962  | 7.230071355  |
| C | 17.843048899 | 8.275405995  | 5.924071839  |
| C | 8.534054536  | 4.545031415  | 7.830891329  |
| C | 8.117358627  | 4.804300037  | 6.513684043  |
| C | 8.689491149  | 3.229426864  | 8.299900781  |
| C | 7.848435799  | 3.728975887  | 5.660087193  |
| C | 8.419296343  | 2.165233701  | 7.434414131  |
| C | 7.998318406  | 2.414061288  | 6.120302275  |
| P | 8.875592352  | 5.953969299  | 8.886761957  |
| P | 5.694746603  | 11.256915948 | 9.001411006  |
| P | 11.124155329 | 14.491234056 | 8.837825985  |
| P | 14.383696145 | 9.254047155  | 8.754129536  |
| O | 10.793713436 | 13.161199463 | 8.197848484  |
| O | 6.960493513  | 10.869647199 | 8.272382408  |
| O | 9.107768436  | 7.284973307  | 8.192906038  |
| O | 13.095241087 | 9.675226223  | 8.070058418  |
| H | 8.995107502  | 5.693949163  | 11.956258484 |
| H | 8.437966957  | 9.211299575  | 13.120437647 |
| H | 11.172110749 | 8.514479676  | 13.051709643 |
| H | 5.566058039  | 11.372734666 | 12.081219467 |
| H | 14.645247165 | 9.094728391  | 11.817090007 |
| H | 9.111165817  | 11.943970837 | 13.125777546 |
| H | 11.836422764 | 11.254415723 | 13.029570749 |
| H | 11.223065438 | 14.776643911 | 11.913303367 |
| H | 13.791870022 | 8.303928870  | 14.007597909 |
| H | 12.636303802 | 9.635404899  | 14.074632195 |
| H | 6.527663154  | 12.147986737 | 14.227402682 |
| H | 7.693700198  | 10.824913811 | 14.225884392 |
| H | 8.309104379  | 6.535095752  | 14.173368942 |
| H | 9.572082816  | 7.763615766  | 14.150019304 |

|   |              |              |              |
|---|--------------|--------------|--------------|
| H | 12.049496898 | 13.923558063 | 14.082137657 |
| H | 10.774917656 | 12.705831319 | 14.136319331 |
| H | 15.700799430 | 9.974139159  | 13.896517297 |
| H | 14.710560592 | 10.228490831 | 15.358870736 |
| H | 10.289140774 | 15.753482192 | 14.013927809 |
| H | 10.104302713 | 14.732638660 | 15.465510353 |
| H | 4.626767290  | 10.462328491 | 14.205743087 |
| H | 5.690250222  | 10.217847197 | 15.617288665 |
| H | 10.073508540 | 4.719106021  | 14.001415071 |
| H | 10.347198141 | 5.748308067  | 15.432222242 |
| H | 3.142576578  | 12.602769606 | 9.628886852  |
| H | 5.144241243  | 10.786840004 | 6.247548947  |
| H | 1.178273159  | 13.123921093 | 8.183517282  |
| H | 3.163438066  | 11.300913044 | 4.802724798  |
| H | 1.192063176  | 12.473155665 | 5.775308822  |
| H | 12.793854475 | 16.920696164 | 9.106833152  |
| H | 10.203554532 | 15.026920874 | 6.199823768  |
| H | 13.251673440 | 18.764980369 | 7.490973038  |
| H | 10.645496666 | 16.891796234 | 4.594055066  |
| H | 12.178273249 | 18.746644678 | 5.238259725  |
| H | 14.881123239 | 9.981612790  | 6.050338378  |
| H | 16.838440404 | 7.654728956  | 9.134279865  |
| H | 16.759690919 | 9.469250372  | 4.476545179  |
| H | 18.697663674 | 7.134458923  | 7.555662166  |
| H | 18.655272487 | 8.040926496  | 5.233191580  |
| H | 8.016012879  | 5.835729506  | 6.168453957  |
| H | 9.027472885  | 3.043309967  | 9.320921255  |
| H | 7.524091955  | 3.918129407  | 4.634787995  |
| H | 8.540933664  | 1.139886731  | 7.786536378  |
| H | 7.790082355  | 1.577489286  | 5.449654103  |
| H | 5.813479347  | 9.135214992  | 14.202362223 |
| H | 9.010996845  | 14.515416481 | 14.070014889 |
| H | 14.525506962 | 11.311611029 | 13.951027747 |
| H | 11.345765506 | 5.965158547  | 13.968207134 |
| C | 9.833354185  | 10.366253145 | 7.211440638  |
| H | 10.279922643 | 11.370708786 | 7.143451244  |
| H | 8.747246791  | 10.483718584 | 7.343978009  |
| N | 10.385852066 | 9.698493307  | 8.435559500  |
| H | 9.964147719  | 8.732580905  | 8.521756342  |
| H | 11.442471717 | 9.630898460  | 8.378761386  |
| H | 10.134185836 | 10.260685452 | 9.261027768  |
| C | 10.096121117 | 9.613441964  | 5.928822240  |
| O | 9.582984633  | 9.923147958  | 4.868675605  |
| O | 10.976330023 | 8.575776705  | 6.073429358  |
| H | 11.069382072 | 8.168818691  | 5.184655244  |
| C | 14.361341024 | 12.868443456 | 8.529113398  |
| H | 15.332949201 | 12.373906334 | 8.394638375  |
| H | 13.710230813 | 12.592938093 | 7.681107714  |
| H | 14.498374532 | 13.958735004 | 8.505553888  |
| C | 7.484158283  | 14.442315263 | 8.615238108  |
| H | 7.909952233  | 13.885433612 | 7.762016586  |
| H | 6.390794470  | 14.440766614 | 8.511671677  |
| H | 7.857800368  | 15.475011201 | 8.565117653  |
| C | 5.646329143  | 7.629491349  | 8.768948858  |
| H | 6.166217063  | 8.037746553  | 7.884396890  |
| H | 5.609699814  | 6.535574876  | 8.674296591  |
| H | 4.623885191  | 8.032503987  | 8.773363163  |
| C | 12.509436172 | 6.115460604  | 8.394613195  |
| H | 13.597315256 | 5.993304266  | 8.297664379  |
| H | 12.019064323 | 5.139274300  | 8.280242494  |
| H | 12.167455029 | 6.771210414  | 7.573951194  |

| <b>T<sub>iiii</sub>[C<sub>2</sub>H<sub>5</sub>, CH<sub>3</sub>, Ph]•sarcosine adduct</b> |              |              | <b>E= -682.108819</b> |
|------------------------------------------------------------------------------------------|--------------|--------------|-----------------------|
| C                                                                                        | 9.262634231  | 6.658563951  | 12.228126475          |
| C                                                                                        | 8.150611018  | 7.551477767  | 11.687632885          |
| C                                                                                        | 10.584661840 | 7.023989265  | 11.559120326          |
| C                                                                                        | 7.386732817  | 7.161343851  | 10.576824305          |
| C                                                                                        | 7.867638364  | 8.802324082  | 12.250202607          |
| C                                                                                        | 10.962449665 | 6.436109683  | 10.341698917          |
| C                                                                                        | 11.459901601 | 7.968324589  | 12.113957881          |
| C                                                                                        | 6.377098322  | 7.953638893  | 10.018497573          |
| O                                                                                        | 7.628415132  | 5.908563224  | 9.961217421           |
| C                                                                                        | 6.863300295  | 9.641901027  | 11.751080194          |
| C                                                                                        | 12.148751717 | 6.760438537  | 9.667150835           |
| O                                                                                        | 10.163479703 | 5.422859641  | 9.768108538           |
| C                                                                                        | 12.677988255 | 8.315955201  | 11.514015950          |
| C                                                                                        | 6.135209883  | 9.186032757  | 10.641163954          |
| C                                                                                        | 6.591652228  | 11.016758627 | 12.356659603          |
| C                                                                                        | 12.992413321 | 7.685333994  | 10.299107448          |
| C                                                                                        | 13.618716961 | 9.347208419  | 12.129228833          |
| O                                                                                        | 5.114561059  | 9.989102411  | 10.090032786          |
| C                                                                                        | 7.490566243  | 12.061491421 | 11.703119680          |
| O                                                                                        | 14.239300238 | 7.922507828  | 9.683321947           |
| C                                                                                        | 13.308055767 | 10.730107271 | 11.559421177          |
| C                                                                                        | 7.078656668  | 12.737444610 | 10.542934738          |
| C                                                                                        | 8.751102008  | 12.386200754 | 12.219506439          |
| C                                                                                        | 13.962761454 | 11.203551370 | 10.412765798          |
| C                                                                                        | 12.336330295 | 11.561705574 | 12.131328879          |
| O                                                                                        | 5.801288825  | 12.484056337 | 10.001892261          |
| C                                                                                        | 7.865927068  | 13.695967242 | 9.891596751           |
| C                                                                                        | 9.577002384  | 13.356302036 | 11.636040988          |
| O                                                                                        | 14.957410909 | 10.408899620 | 9.791878436           |
| C                                                                                        | 13.679046715 | 12.438967131 | 9.817486850           |
| C                                                                                        | 12.015951159 | 12.817881199 | 11.601317130          |
| C                                                                                        | 9.104238499  | 13.991893420 | 10.477814316          |
| C                                                                                        | 10.943087384 | 13.705820560 | 12.220460933          |
| C                                                                                        | 12.702326597 | 13.222396413 | 10.445907791          |
| O                                                                                        | 9.872160526  | 15.005107018 | 9.862129039           |
| O                                                                                        | 12.413624672 | 14.471558393 | 9.858633894           |
| C                                                                                        | 13.621539664 | 9.324659085  | 13.669964573          |
| C                                                                                        | 6.683462079  | 11.021825617 | 13.894454374          |
| C                                                                                        | 9.340619028  | 6.663534712  | 13.767027367          |
| C                                                                                        | 10.965875597 | 13.683105795 | 13.760935317          |
| C                                                                                        | 14.688344700 | 10.258315471 | 14.250116160          |
| C                                                                                        | 9.987846960  | 14.697854983 | 14.359702540          |
| C                                                                                        | 5.650914894  | 10.086402056 | 14.529240713          |
| C                                                                                        | 10.362638554 | 5.650826567  | 14.291609740          |
| C                                                                                        | 4.197070524  | 11.561092206 | 8.039895006           |
| C                                                                                        | 3.097475338  | 12.235837878 | 8.596585949           |
| C                                                                                        | 4.229770037  | 11.221706339 | 6.676640644           |
| C                                                                                        | 2.021436016  | 12.573379760 | 7.771094396           |
| C                                                                                        | 3.143440345  | 11.560712568 | 5.863161313           |
| C                                                                                        | 2.044490268  | 12.236105464 | 6.409675344           |
| C                                                                                        | 11.428598677 | 15.913185615 | 7.794291082           |
| C                                                                                        | 12.318939725 | 16.929374236 | 8.178543863           |
| C                                                                                        | 10.816672198 | 15.924274182 | 6.528904288           |
| C                                                                                        | 12.598914540 | 17.962419487 | 7.279254544           |
| C                                                                                        | 11.099242961 | 16.967117999 | 5.642338854           |
| C                                                                                        | 11.992267502 | 17.980064896 | 6.015770392           |
| C                                                                                        | 15.772890199 | 8.874864102  | 7.671806310           |
| C                                                                                        | 15.732164421 | 9.356315362  | 6.351903643           |
| C                                                                                        | 16.841087755 | 8.082226793  | 8.125534327           |
| C                                                                                        | 16.777538217 | 9.041139522  | 5.478185480           |
| C                                                                                        | 17.876210716 | 7.770657131  | 7.239222347           |



|   |              |              |              |
|---|--------------|--------------|--------------|
| C | 17.844608697 | 8.248590176  | 5.921509962  |
| C | 8.527886214  | 4.462868846  | 7.828253935  |
| C | 8.147611570  | 4.700191794  | 6.495942699  |
| C | 8.647629848  | 3.156655177  | 8.331568841  |
| C | 7.880702026  | 3.610828572  | 5.660073649  |
| C | 8.381814321  | 2.078504545  | 7.483401229  |
| C | 7.998765765  | 2.304939727  | 6.153523519  |
| P | 8.861824959  | 5.893686487  | 8.854812101  |
| P | 5.645982477  | 11.153510714 | 9.018436548  |
| P | 11.090022728 | 14.497223113 | 8.847154391  |
| P | 14.382047889 | 9.271190532  | 8.731236385  |
| O | 10.789214434 | 13.181628493 | 8.165876644  |
| O | 6.901370902  | 10.757865881 | 8.276519621  |
| O | 9.047083559  | 7.213910144  | 8.129492896  |
| O | 13.100936173 | 9.689315595  | 8.034133900  |
| H | 9.026361125  | 5.625745228  | 11.922811580 |
| H | 8.448160772  | 9.134726032  | 13.112456118 |
| H | 11.191539209 | 8.435009999  | 13.062611088 |
| H | 5.552852198  | 11.278828250 | 12.096741550 |
| H | 14.639315152 | 9.088783479  | 11.801637001 |
| H | 9.091969730  | 11.885231074 | 13.126818919 |
| H | 11.811131704 | 11.221087768 | 13.025204219 |
| H | 11.163812452 | 14.741176068 | 11.912724339 |
| H | 13.800114067 | 8.285092360  | 13.992405833 |
| H | 12.629941877 | 9.603826586  | 14.065145063 |
| H | 6.528269542  | 12.058831729 | 14.236195874 |
| H | 7.697020395  | 10.737997206 | 14.226177324 |
| H | 8.333902575  | 6.429645717  | 14.151077612 |
| H | 9.583698978  | 7.672023569  | 14.143268108 |
| H | 11.997125990 | 13.903432809 | 14.083804299 |
| H | 10.736035103 | 12.672282733 | 14.139707925 |
| H | 15.690001659 | 9.978663126  | 13.883808630 |
| H | 14.700233026 | 10.211269329 | 15.349823122 |
| H | 10.218428181 | 15.715271339 | 14.002673536 |
| H | 10.040457269 | 14.699384242 | 15.459401858 |
| H | 4.630624364  | 10.372813317 | 14.225084401 |
| H | 5.704445118  | 10.121691395 | 15.628155170 |
| H | 10.116019875 | 4.635027516  | 13.940811580 |
| H | 10.379382676 | 5.637742055  | 15.392253636 |
| H | 3.094594301  | 12.506953451 | 9.653864999  |
| H | 5.105641461  | 10.715615113 | 6.264215000  |
| H | 1.166778952  | 13.107558122 | 8.189828826  |
| H | 3.158760268  | 11.305308870 | 4.801632619  |
| H | 1.203619741  | 12.508798254 | 5.768670150  |
| H | 12.798787738 | 16.897336979 | 9.158012801  |
| H | 10.145766037 | 15.112226109 | 6.239571639  |
| H | 13.301576792 | 18.747901350 | 7.562380157  |
| H | 10.632040326 | 16.983356044 | 4.655635638  |
| H | 12.222589155 | 18.782933837 | 5.312805616  |
| H | 14.881628581 | 9.954915005  | 6.018013610  |
| H | 16.851681144 | 7.703447067  | 9.149085424  |
| H | 16.755632547 | 9.407349705  | 4.449790528  |
| H | 18.705434181 | 7.146678330  | 7.576648791  |
| H | 18.653544566 | 7.996363904  | 5.233040097  |
| H | 8.072314994  | 5.725675234  | 6.127275743  |
| H | 8.954522700  | 2.988425956  | 9.365502140  |
| H | 7.585006233  | 3.781167896  | 4.622888168  |
| H | 8.478083035  | 1.060092538  | 7.860749433  |
| H | 7.795836517  | 1.456782795  | 5.496095738  |
| H | 5.817077076  | 9.045627460  | 14.207716092 |
| H | 8.952911805  | 14.464124074 | 14.062292722 |
| H | 14.498528123 | 11.301214188 | 13.949464625 |

|   |              |              |              |
|---|--------------|--------------|--------------|
| H | 11.375899498 | 5.893559659  | 13.933286022 |
| C | 9.830538128  | 10.314025802 | 7.224489246  |
| H | 10.276365355 | 11.321560321 | 7.199179509  |
| H | 8.743848638  | 10.427902230 | 7.356739457  |
| N | 10.372607994 | 9.599089100  | 8.420402404  |
| H | 9.976682375  | 8.623638960  | 8.418059683  |
| H | 11.420848900 | 9.542434642  | 8.338074766  |
| C | 9.999791003  | 10.289452000 | 9.697238492  |
| H | 10.425919614 | 9.714192667  | 10.528751820 |
| H | 10.409763730 | 11.307278144 | 9.673005446  |
| H | 8.904379801  | 10.322008002 | 9.764066042  |
| C | 10.093371140 | 9.615481315  | 5.911689207  |
| O | 9.585349499  | 9.963525223  | 4.861246006  |
| O | 10.969400977 | 8.566618831  | 6.019143116  |
| H | 11.061448058 | 8.192878605  | 5.115826906  |
| C | 5.633282455  | 7.535109492  | 8.781891384  |
| H | 6.161767247  | 7.918977416  | 7.891818367  |
| H | 5.580966318  | 6.440225860  | 8.706092346  |
| H | 4.616850097  | 7.952645523  | 8.778648993  |
| C | 12.496726138 | 6.165161172  | 8.331063211  |
| H | 13.584357779 | 6.043551241  | 8.230113548  |
| H | 12.004557632 | 5.192754166  | 8.194695103  |
| H | 12.155730947 | 6.839926337  | 7.525651751  |
| C | 14.336022808 | 12.876639261 | 8.538579877  |
| H | 15.330242082 | 12.421562140 | 8.431395568  |
| H | 13.714827832 | 12.559490835 | 7.682878991  |
| H | 14.427158507 | 13.971108979 | 8.501497163  |
| C | 7.431476649  | 14.352858263 | 8.611428290  |
| H | 7.888123140  | 13.824770483 | 7.755817489  |
| H | 6.340199879  | 14.312014524 | 8.496441371  |
| H | 7.766462807  | 15.399723539 | 8.578462249  |

## References.

- 1 (a) I. L. Swift *Surf. Interface Anal.* **1982**, *4*, 47–51. (b) D. Briggs & G. Beamson *Anal. Chem.* **1992**, *64*, 1729–1736.
- 2 E. U. Thoden van Velzen, J. F. J. Engbersen & D. N. Reinhoudt, Synthesis of self-assembling resorcin[4]arene tetrasulfide adsorbates. *Synthesis* **1995**, 989-997.
- 3 SADABS Bruker AXS; Madison, Wisconsin, USA, 2004; SAINT, Software Users Guide, Version 6.0; Bruker Analytical X-ray Systems. In *Software Users Guide, Version 6.0; Bruker Analytical X-ray Systems*, Madison, WI **1999**. Sheldrick, G. M. *SADABS v2.03: Area-Detector Absorption Correction*. University of Göttingen, Germany **1999**.
- 4 A. Altomare, M. C. Burla, M. Camalli, G. L. Cascarano, C. Giacovazzo, A. Guagliardi, A. G. G. Moliterni, G. Polidori, R. Spagna, SIR97: a new tool for crystal structure determination and refinement. *J. Appl. Crystallogr.* **1999**, *32*, 115–119.
- 5 G. M. Sheldrick, *SHELXL-97. Program for Crystal Structure Refinement*. University of Göttingen, Germany, **1997**; G. M. Sheldrick, A short history of SHELX. *Acta Cryst.* **2008**, *A64*, 112–122.
- 6 L. J. Farrugia, WinGX suite for small-molecule single-crystal crystallography. *J. Appl. Crystallogr.* **1999**, *32*, 837-838.
- 7 SQUEEZE -. P. v.d Sluis, A. L. Spek, BYPASS: an effective method for the refinement of crystal structures containing disordered solvent regions. *Acta Crystallogr.* **1990**, *A46*, 194–201.
- 8 PARST – M. Nardelli, Parst: A system of fortran routines for calculating molecular structure parameters from results of crystal structure analyses. *Comput. Chem.* **1983**, *7*, 95–98; M. Nardelli, PARST95 - an update to PARST: a system of Fortran routines for calculating molecular structure parameters from the results of crystal structure analyses. *J. Appl. Crystallogr.* **1995**, *28*, 659.
- 9 F. Bianchi et al. Fully Automated Solid-Phase Microextraction-Fast Gas Chromatography-Mass Spectrometry Method Using a New Ionic Liquid Column for High-Throughput Analysis of Sarcosine and N-ethylglycine in Human Urine and Urinary Sediments. *Anal. Chim. Acta* **2011**, *707*, 197-203.
- 10 J. Vande Vondele, M. Krack, F. Mohamed, M. Parrinello, T. Chassaing, J. Hutter, QUICKSTEP: Fast and accurate density functional calculations using a mixed Gaussian and plane waves approach. *Comput. Phys. Commun.* **2005**, *67*, 103-128.
11. The CP2K developers group. <http://cp2k.berlios.de/>
12. S. Grimme, Semiempirical GGA-type density functional constructed with a long-range dispersion correction. *J. Comput. Chem.* **2006**, *27*, 1787-1799.
13. S. Goedecker, M. Teter, J. Hutter, Separable dual-space Gaussian pseudopotentials. *Phys. Rev. B* **1996**, *54*, 1703-1710.
14. J.P. Perdew, K. Burke, M. Ernzerhof, Generalized Gradient Approximation Made Simple. *Phys. Rev. Lett.* **1996**, *77*, 3865-3868.
